# Supplementary material for: Transcriptomic profiling of induced steatosis in human and mouse precision-cut liver slices
Source: PubMed Central journal article supplement (PMC10199090; doi:10.1038/s41597-023-02220-0), 2023-05-19
Supplement: 41597_2023_2220_MOESM1_ESM.pdf [file 41597_2023_2220_MOESM1_ESM.pdf]

## Supplementary Information

### Figure S1: RNA quality and yield.

Box plots show RNA integrity numbers (RIN) and RNA concentration yield from all human (left) and mouse (right) samples across the different conditions of our experiment. Color code indicates the sample donor or animal. Box plot indicates minimum, lower quartile, median, upper quartile, maximum value per condition. The dashed line indicates RIN = 7.5.

### Figure S2: Gene Biotype

Gene biotype distribution of mapped genes across experimental conditions as predicted by our processing pipeline and Ensembl 86 reference annotation.

### Figure S3. Principal Component Analysis.

Scatter plot with of 1st principal component (PC) vs. 2nd PC (top), 1st vs. 3rd (middle) and 2nd vs. 3rd (bottom) for human (left) and mouse (right) samples. Different symbol shapes indicate different timepoints i.e. circles for 24h and triangles for 48h. Different colors indicate the different donors. All plots have the same height and 1:1 scale of both axes, aspect ratio of individual plot is determined by relative spread across the two principal components.

### Figure S4. Expression variability across conditions.

Comparison of squared variation coefficient across conditions between human (left) and mouse (right) samples. Condition is marked by color code. Smoothing function is applied according to gam (generalized additive models with integrated smoothness estimation).

### Figure S5. Explained variance by Principal Component.

Line plots showing the explained variance (%) by first ten principal components for human (left) and mouse (right).

### Figure S6. Top Genes from PCA loadings.

Top genes based on PCA loadings in human (left) and mouse (right).

### Supplementary Code.

R-Code for generating the figures and table in the manuscript.

Fig S1

Human

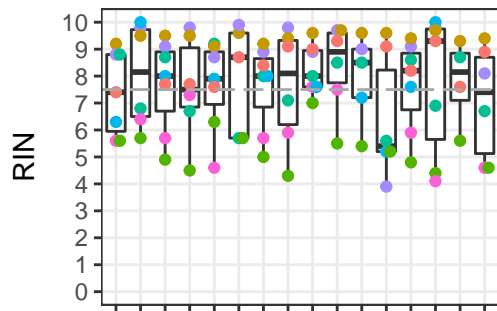

Mouse

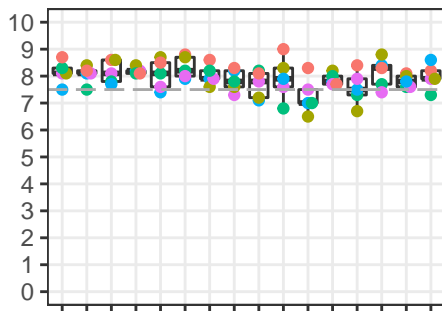

Human donor

- H1
- H26
- H27
- H29
- TX06
- TX08
- TX25

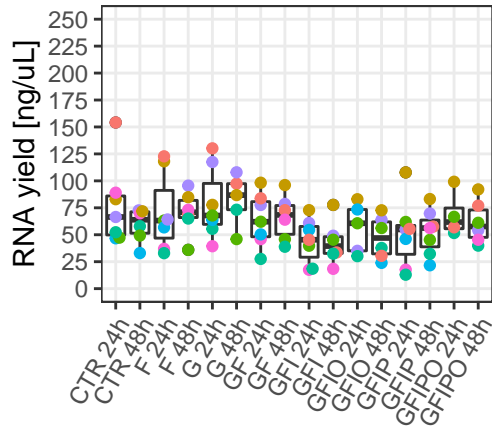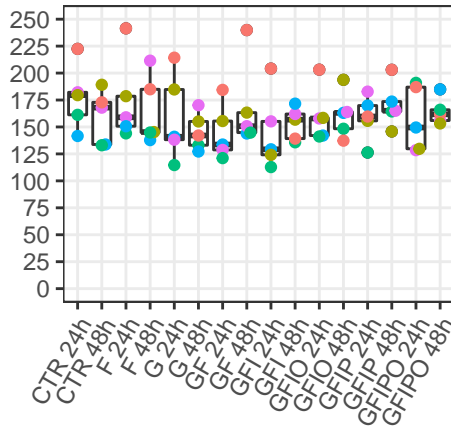

Mouse donor

- m1
- m2
- m3
- m4
- m5

Fig S2

## Human

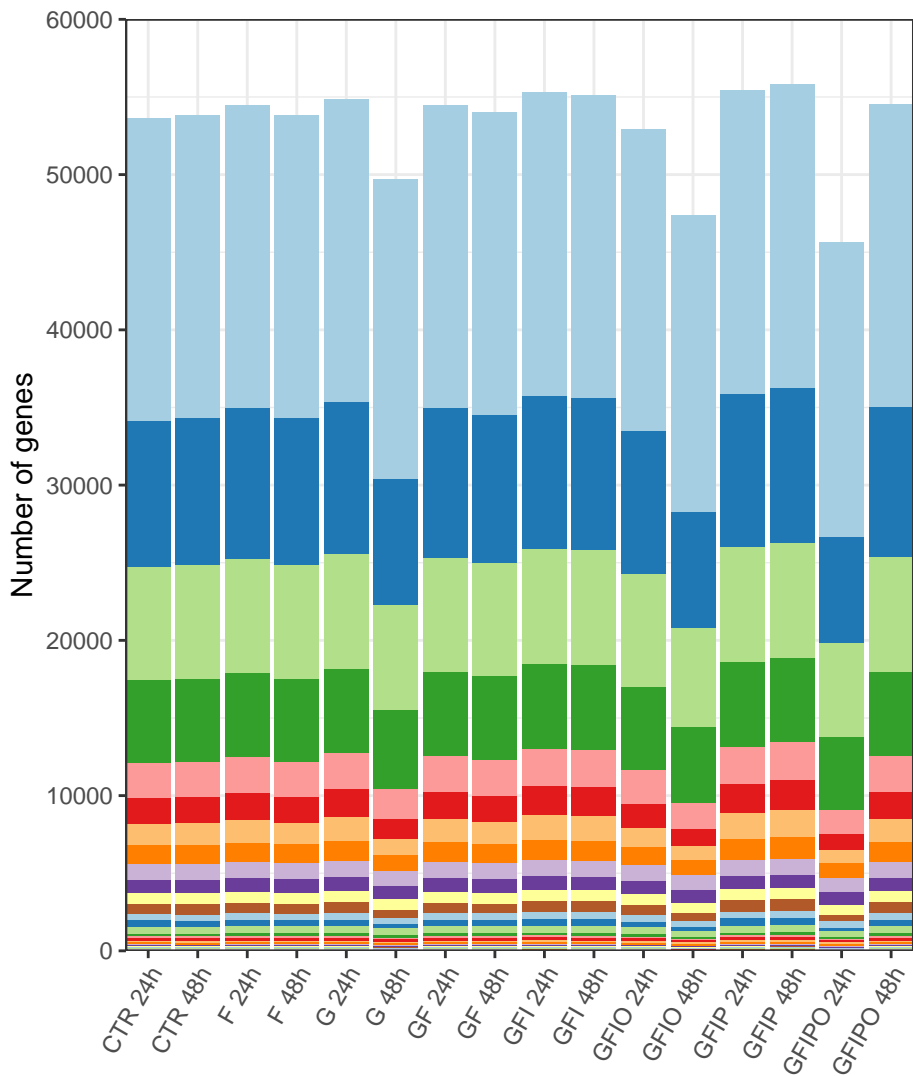

## Type (ordered by decreasing proportion)

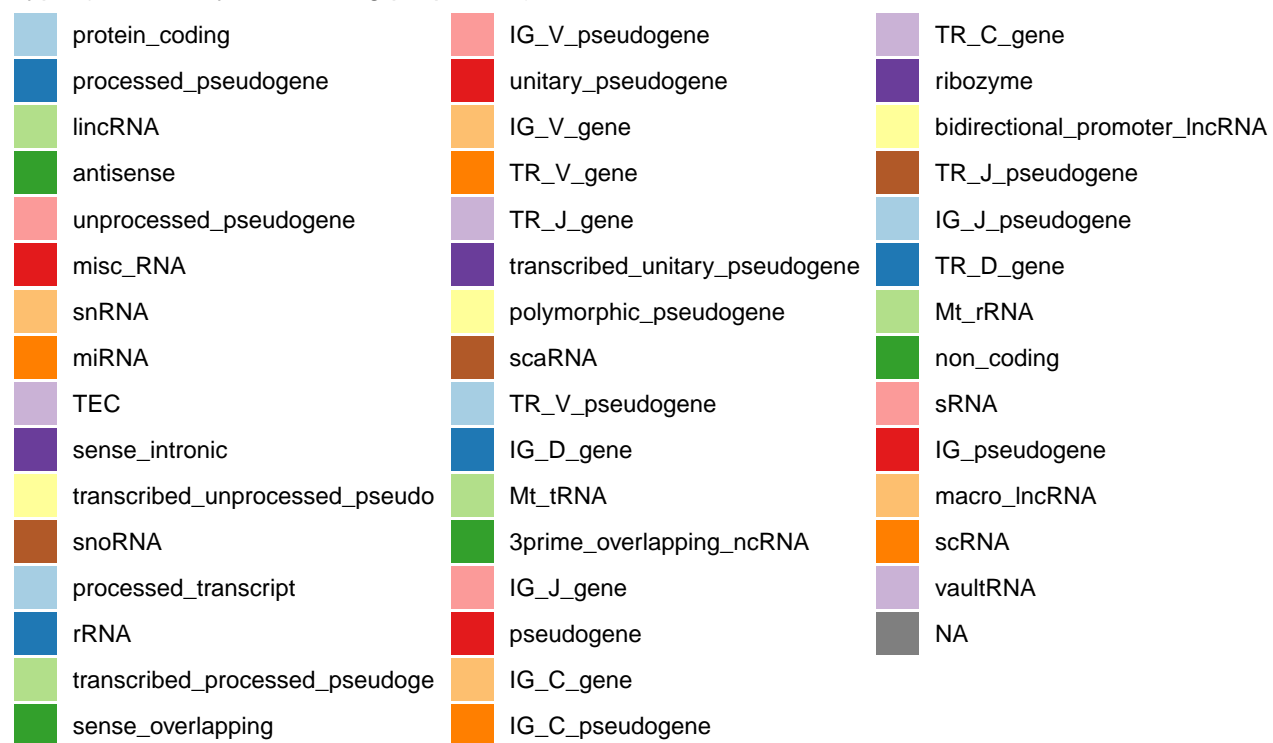

## Mouse

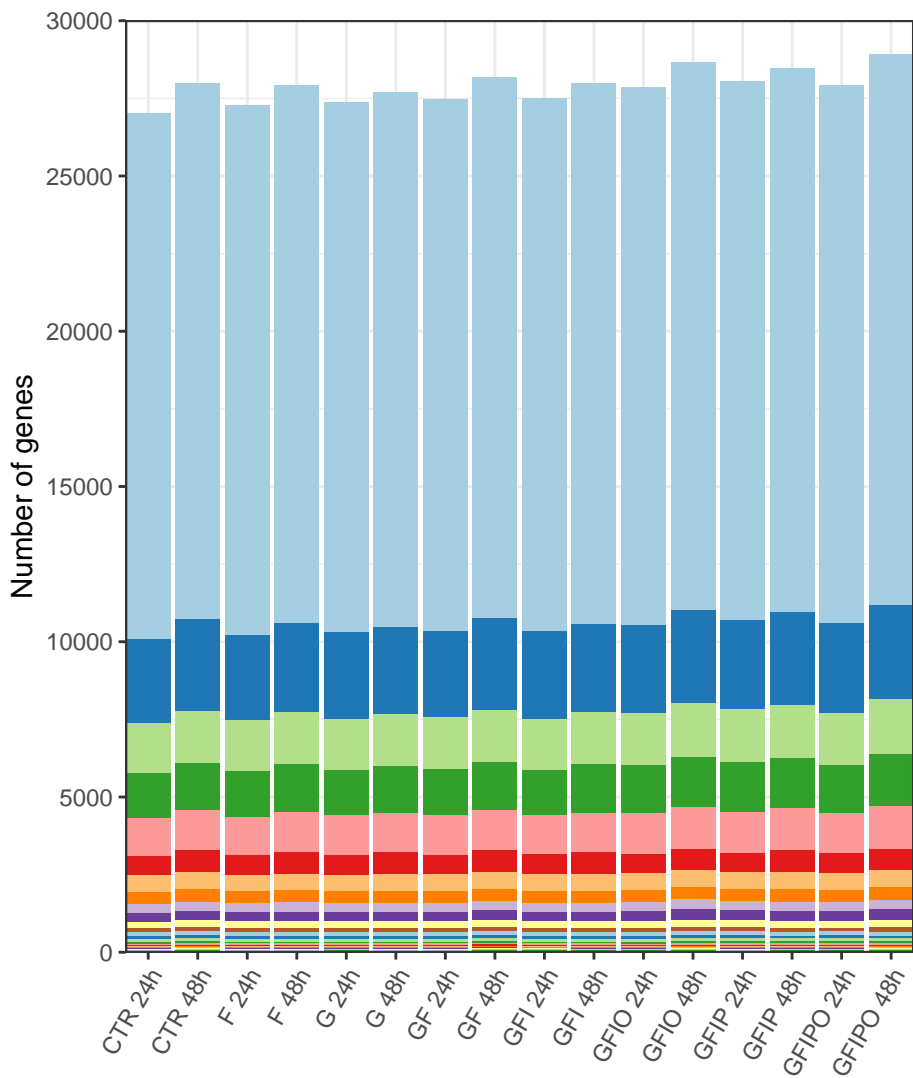

## Type (ordered by decreasing proportion)

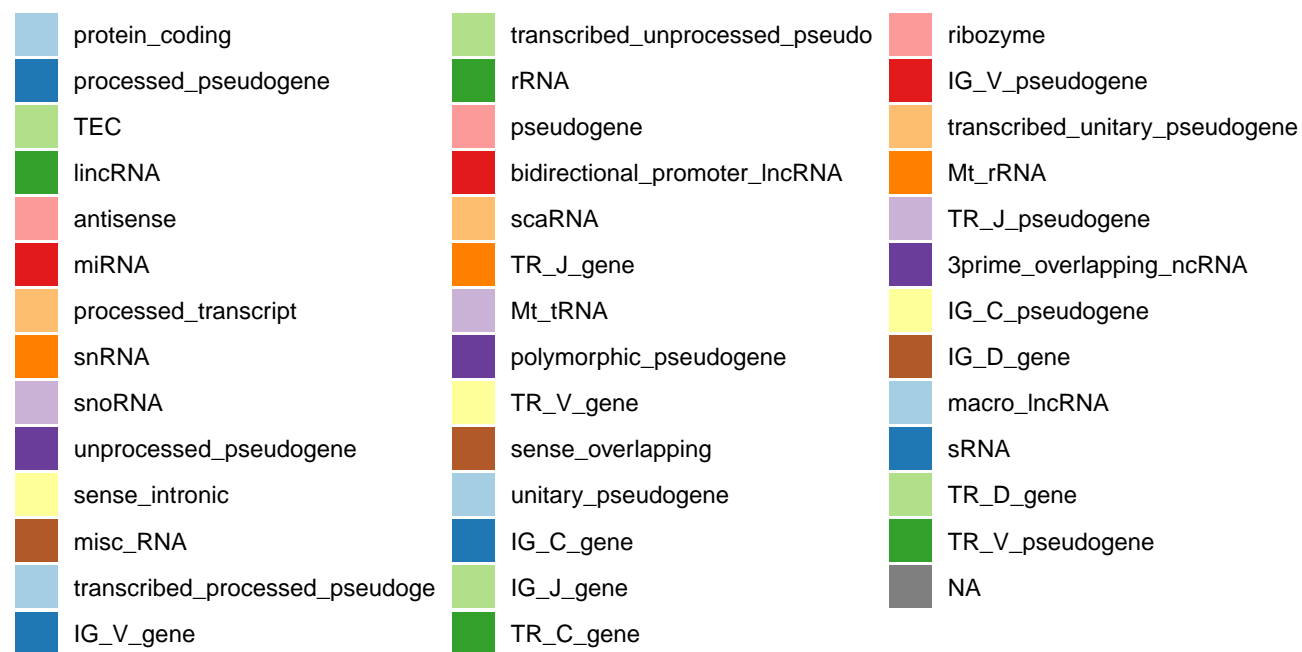

Fig S3

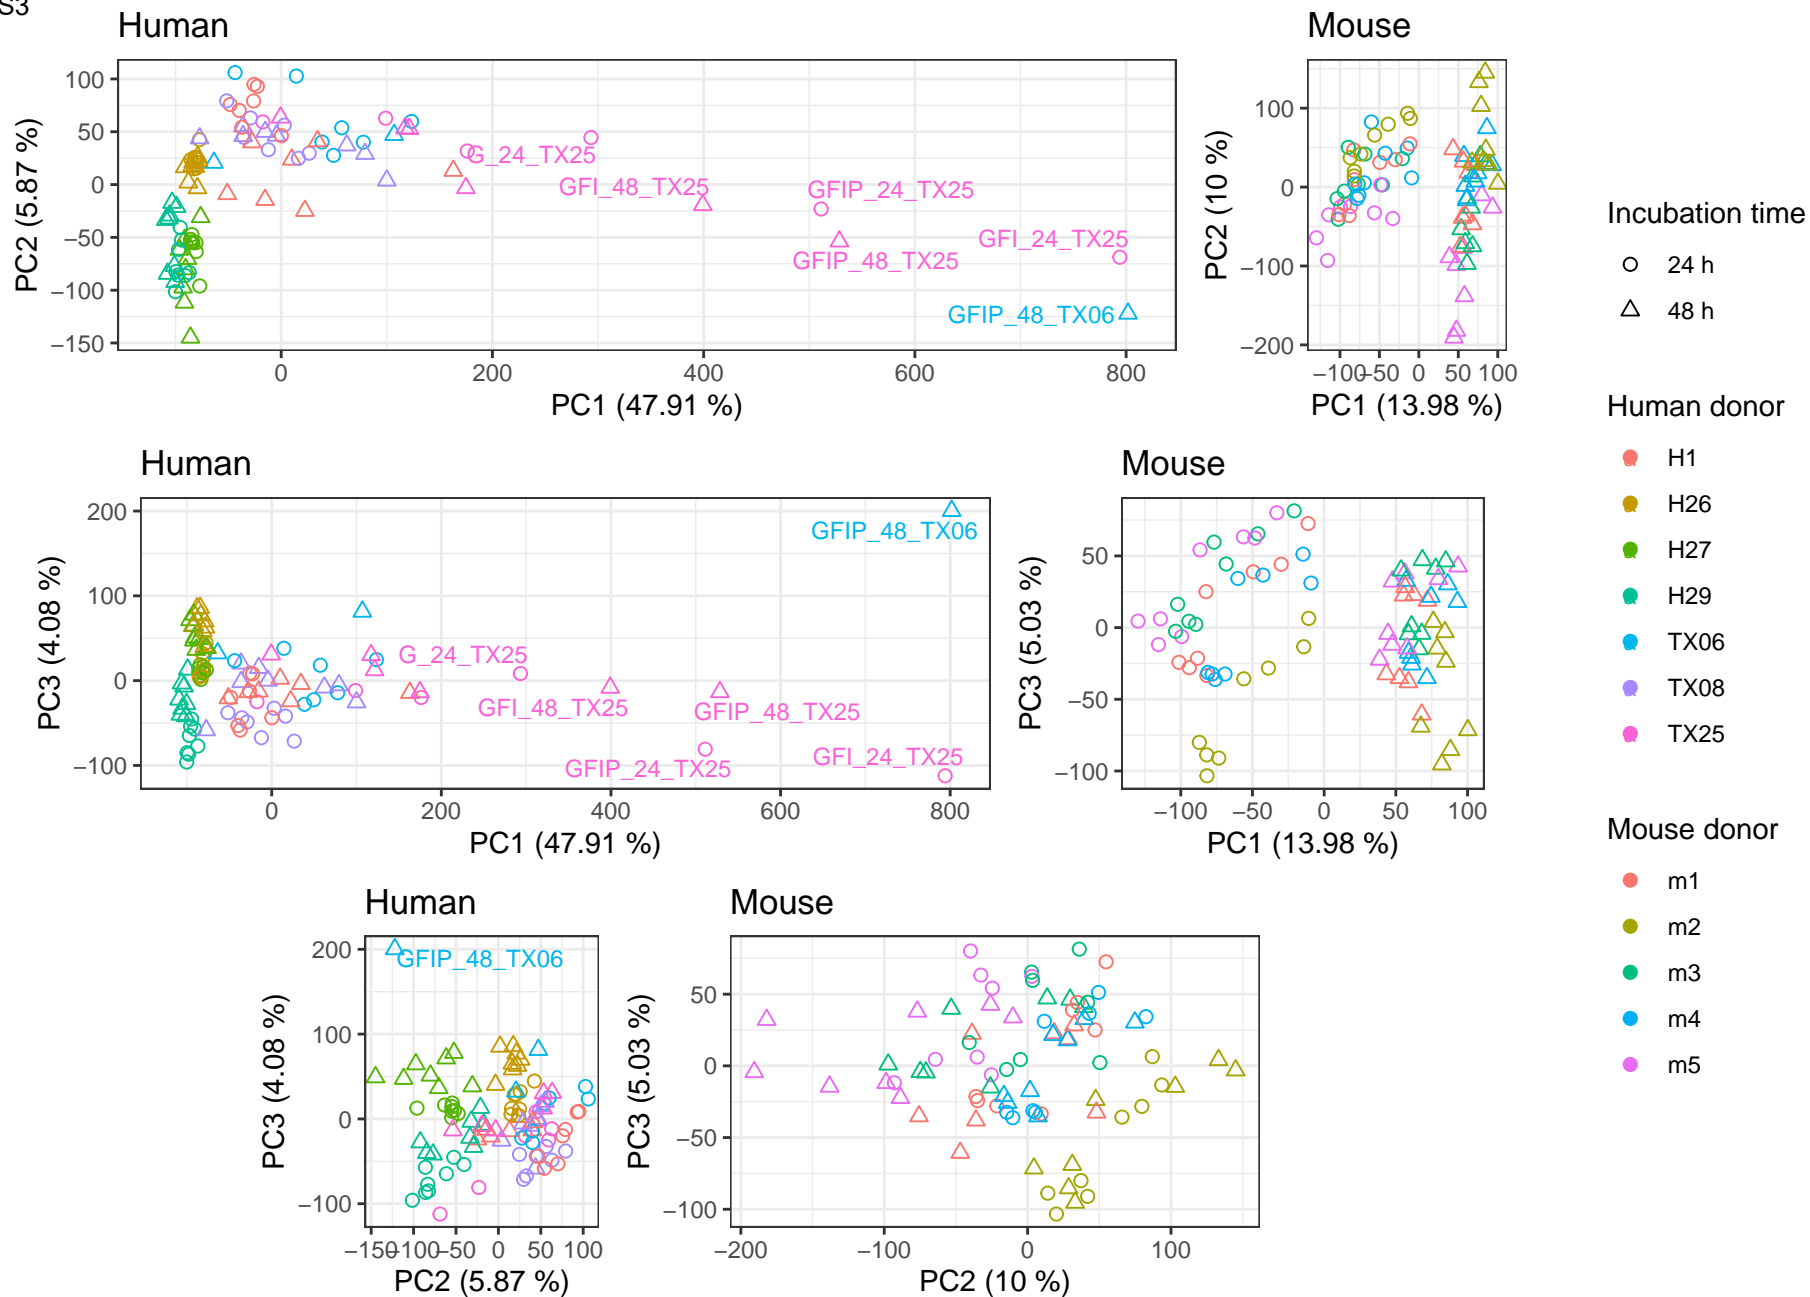



Fig S5

Human

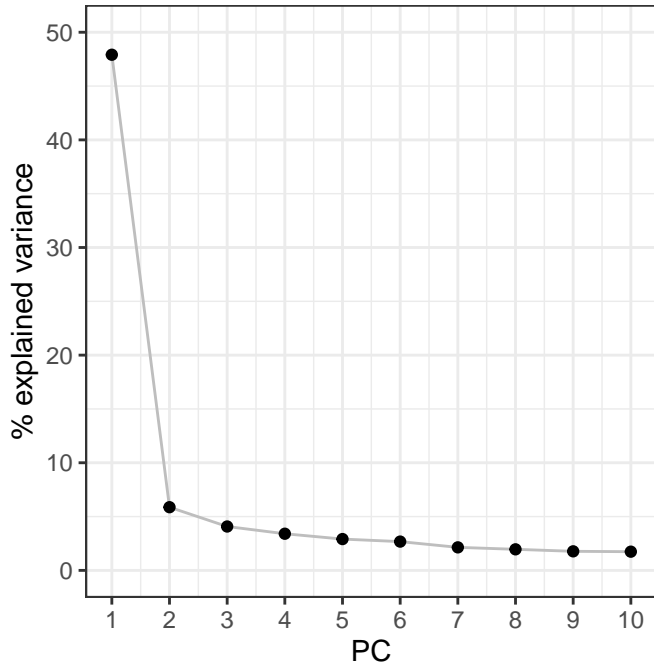

Mouse

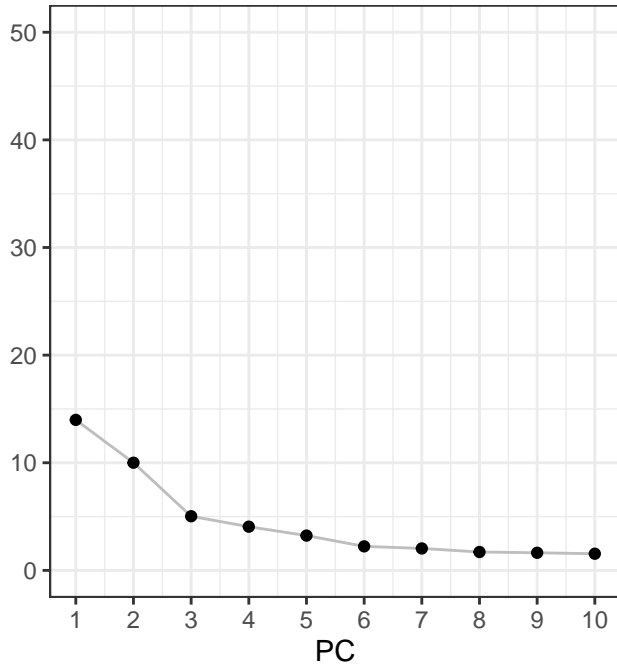

Fig S6

Human

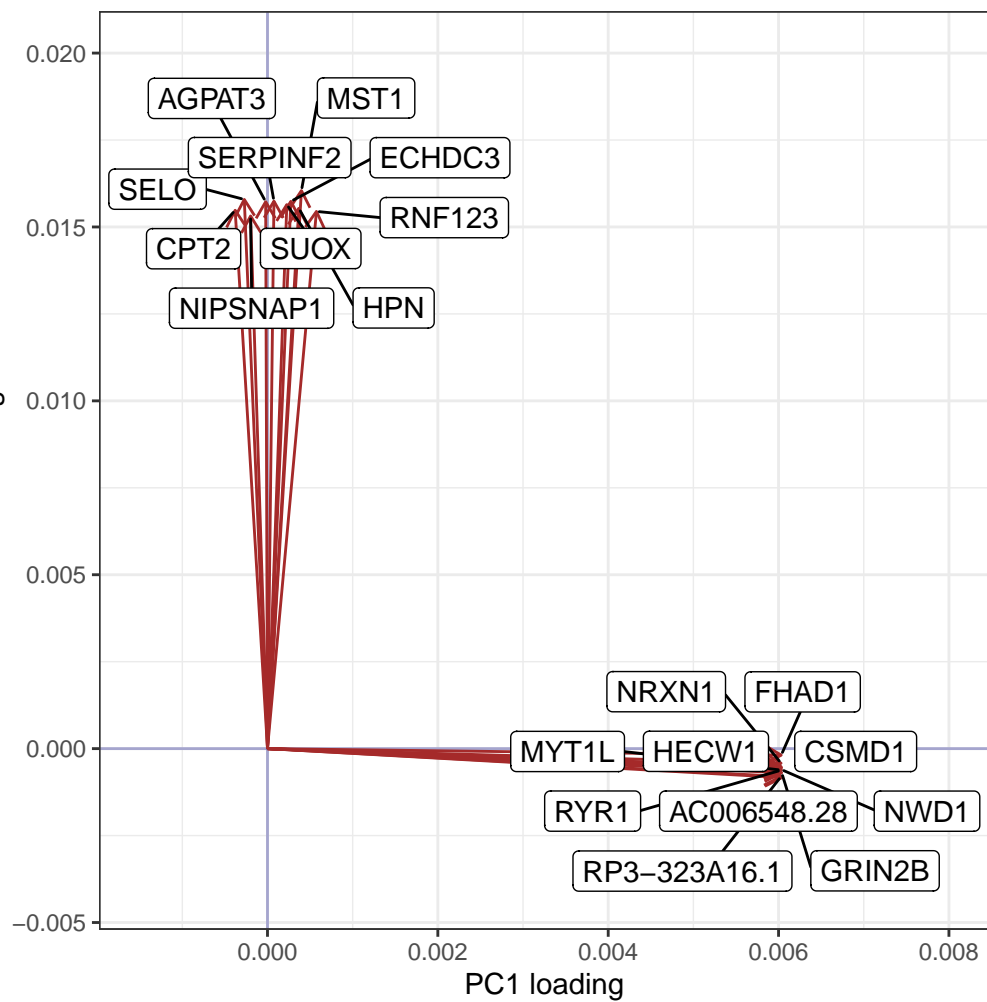

Mouse

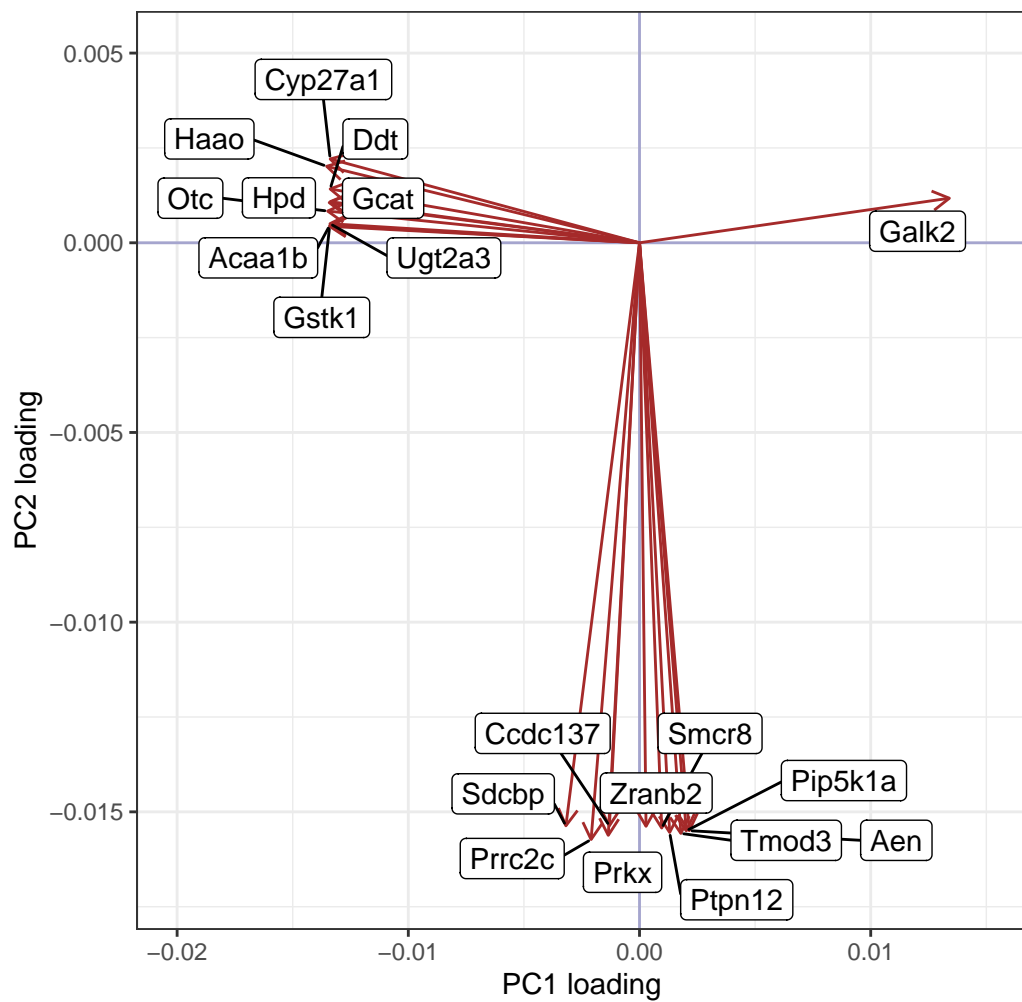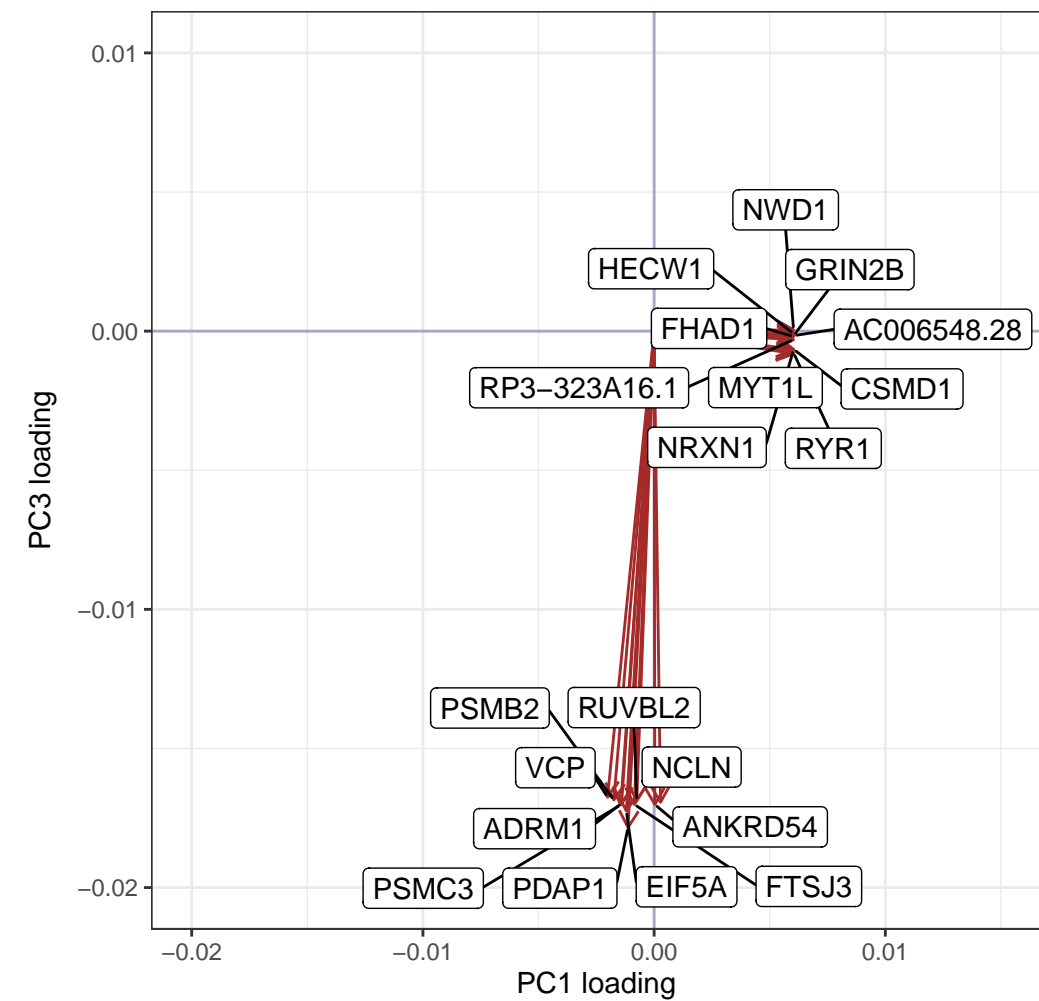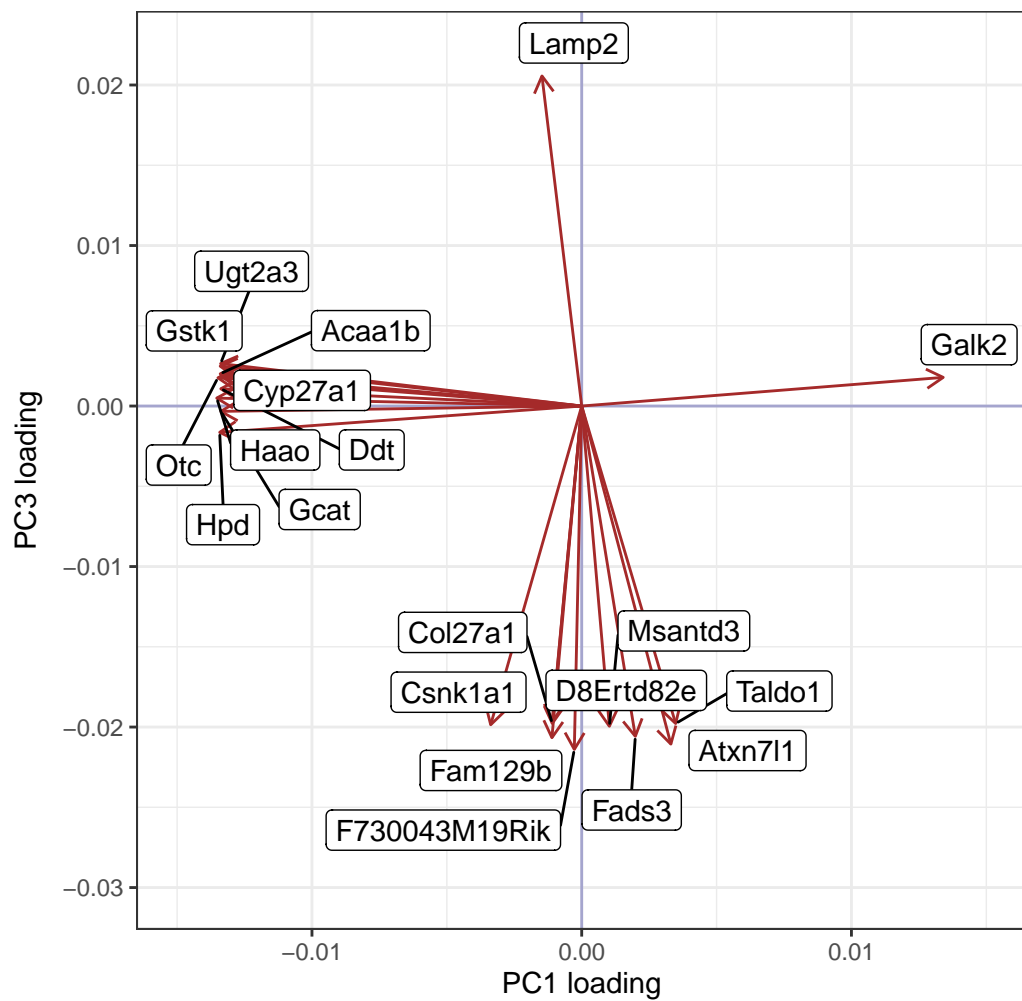

# Supplementary Code

## Setup

```
library(tidyverse)
library(ggplot2)
library(grid)
library(gridExtra)
library(SummarizedExperiment)
library(patchwork)
library(ggbeeswarm)

#loads an RData file, and returns it
loadRData <- function(fileName){
  load(fileName)
  get(ls()[ls() != "fileName"])
}

if (!dir.exists("plots")) dir.create("plots")

palette_categorical <- rep(RColorBrewer::brewer.pal(12, "Paired"), 4)

palette_cat_16 = c(
  "dodgerblue2",
  "#E31A1C",
  "green4",
  "#6A3D9A",
  "#FF7F00",
  "black",
  "gold1",
  "skyblue2",
  "palegreen2",
  "#FDBF6F",
  "gray70",
  "maroon",
  "orchid1",
  "darkturquoise",
  "darkorange4",
  "brown"
)
```



## Load data

```
## Get pipeline output paths -----
cget_path <- params$cget_path
cgetd_path_mouse <- params$cgetd_path_mouse
cgetd_path_human <- params$cgetd_path_human
hitfile_path_human <- params$hitfile_path_human
hitfile_path_mouse <- params$hitfile_path_mouse

### Load sample metadata -----
sample_sheet_human <-
  read_tsv(paste0(cgetd_path_human, "pipelineSampleSheet.txt")) %>%
  mutate(sample_name = paste(incubation_medium, incubation_time_h,
                             donor_id, sep = "_"),
         Group = str_remove(Group, "Liver_PCLS_") %>% str_replace("_", " "))

sample_sheet_mouse <-
  read_tsv(paste0(cgetd_path_mouse, "pipelineSampleSheet.txt")) %>%
  mutate(sample_name = paste(treatment, timepoint, animal_id, sep = "_"),
         Group = str_remove(Group, "Liver_PCLS_") %>% str_replace("_", " "))

### Load RNASeq QC metrics -----
## If summary table not exists, read all individual per sample STAR metrics and aggregate
if (file.exists("input_files/rnaseq_qc_human.tsv")) {
  rnaseq_qc_human <- read_tsv("input_files/rnaseq_qc_human.tsv")
} else {
  rnaseq_qc_human <- sample_sheet_human$sampleId %>%
  map_df(~ read_tsv(
    paste0(
      cget_path,
      ".x",
      "/",
      ".x",
      "_star_genome_picardmetrics/",
      "collate-",
      ".x",
      "_star_genome-all-metrics.tsv"
    )
  )) %>%
  mutate(sampleId = str_remove(SAMPLE, "_star_genome")) %>%
  left_join(sample_sheet_human %>% select(sampleId, sample_name)) %>%
  select(sampleId, sample_name, everything())

  stopifnot(all(sample_sheet_human$sampleId %in% rnaseq_qc_human$sampleId))
  write_tsv(rnaseq_qc_human, "input_files/rnaseq_qc_human.tsv")
}

if (file.exists("input_files/rnaseq_qc_mouse.tsv")) {
  rnaseq_qc_mouse <- read_tsv("input_files/rnaseq_qc_mouse.tsv")
} else {
  rnaseq_qc_mouse <- sample_sheet_mouse$sampleId %>%
  map_df(~ read_tsv(
    paste0(
      cget_path,
```

```

        .x,
        "/",
        .x,
        "_star_genome_picardmetrics/",
        "collate-",
        .x,
        "_star_genome-all-metrics.tsv"
    )
  )) %>%
  mutate(sampleId = str_remove(SAMPLE, "_star_genome")) %>%
  left_join(sample_sheet_mouse %>% select(sampleId, sample_name)) %>%
  select(sampleId, sample_name, everything())

stopifnot(all(sample_sheet_human$sampleId %in% rnaseq_qc_human$sampleId))
write_tsv(rnaseq_qc_mouse, "input_files/rnaseq_qc_mouse.tsv")
}

### Load expression matrices -----
norm_counts_human <-
  loadRData(paste0(cgetd_path_human, "results/exprData/exprMatrix.Rdata")) %>%
  assay("normCounts")

# sum(apply(norm_counts_human, 1, var) == 0)
norm_counts_human <-
  norm_counts_human[which(apply(norm_counts_human, 1, var) != 0), ]
# 1268 genes have var == 0 and were removed

norm_counts_mouse <-
  loadRData(paste0(cgetd_path_mouse, "results/exprData/exprMatrix.Rdata")) %>%
  assay("normCounts")

# sum(apply(norm_counts_mouse, 1, var) == 0)
norm_counts_mouse <-
  norm_counts_mouse[which(apply(norm_counts_mouse, 1, var) != 0), ]
# 11352 genes have var == 0 and were removed

### Load Ensembl gene and orthologs info -----
genes <-
  readr::read_tsv(
    "input_files/Ensembl_silicat_table.txt",
    col_types = cols(chr_name = "c")
  )

gene_info_h <- read_csv("input_files/gene_info_human.csv") %>%
  mutate(biotype2 = if_else(biotype == "protein_coding",
    "Protein coding",
    "Not protein coding"))

gene_info_m <- read_csv("input_files/gene_info_mouse.csv") %>%
  mutate(biotype2 = if_else(biotype == "protein_coding",
    "Protein coding",
    "Not protein coding"))

```

```
orthologs_1to1 <- read_csv("input_files/orthologs_1to1.csv")
```

Figure 1. Intracellular triglyceride content of human samples

```
## Filter metadata of samples from 48h.
mdata_48h <- sample_sheet_human %>%
  filter(incubation_time_h == "48") %>%
  arrange(cget_id)

tg_levels <- mdata_48h %>%
  mutate(tg_after = as.numeric(na_if(tg_after, "not measured yet")),
         tg_delta = tg_after - tg_before,
         tg_delta_perc = ((tg_delta / tg_before) * 100) %>% round(2)) %>%
  arrange(sampleId) %>%
  column_to_rownames("sampleId") %>%
  select(tg_before, tg_after, tg_delta, tg_delta_perc)

plot_triglycerides <- function(value, y_scale) {
  mdata_48h %>%
    select(sampleId, incubation_medium, donor_id) %>%
    left_join(tg_levels %>% rownames_to_column("sampleId")) %>%
    pivot_longer(cols = starts_with("tg_"),
                 names_to = "measurement_type",
                 values_to = "measurement_value") %>%
    mutate(measurement_type = factor(measurement_type,
                                     levels = c("tg_before",
                                                  "tg_after",
                                                  "tg_delta",
                                                  "tg_delta_perc"))) %>%

  filter(measurement_type == value) %>%
  ggplot(aes(x = incubation_medium, y = measurement_value)) +
  geom_boxplot(outlier.alpha = 0,
               width = 0.3,
               position = position_nudge(-0.1)) +
  gghalves::geom_half_point_panel(aes(color = donor_id),
                                  transformation = ggbeeswarm::position_quasirandom(
                                    width = 0.1,
                                    groupOnX = TRUE),
                                  alpha = 0.5) +

  theme_bw() +
  facet_wrap(~measurement_type,
             nrow = 1,
             scales = if_else(y_scale == "free", "free_y", "fixed"),
             strip.position = "left",
             labeller = as_labeller(c(tg_after = "tg 48 h (ug/mg)",
                                      tg_before = "tg 0 h (ug/mg)",
                                      tg_delta = "tg delta (ug/mg)",
                                      tg_delta_perc = "tg delta (%)")))) +

  ylab(NULL) +
  theme(strip.background = element_blank(),
        strip.placement = "outside") +
  labs(color = "Donor") +
  theme(axis.title.x = element_blank()) +
  if (y_scale == "fixed") coord_cartesian(ylim = c(0, 160))
}
```

```

p1 <- plot_triglycerides("tg_before", y_scale = "fixed") +
  theme(axis.text.x = element_blank(),
        axis.ticks.x = element_blank())
p2 <- plot_triglycerides("tg_after", y_scale = "fixed") +
  theme(axis.text.x = element_blank(),
        axis.ticks.x = element_blank())
p3 <- plot_triglycerides("tg_delta", y_scale = "free")
p4 <- plot_triglycerides("tg_delta_perc", y_scale = "free")

p1 + p2 + p3 + p4 + plot_layout(guides = "collect", ncol = 2)

```

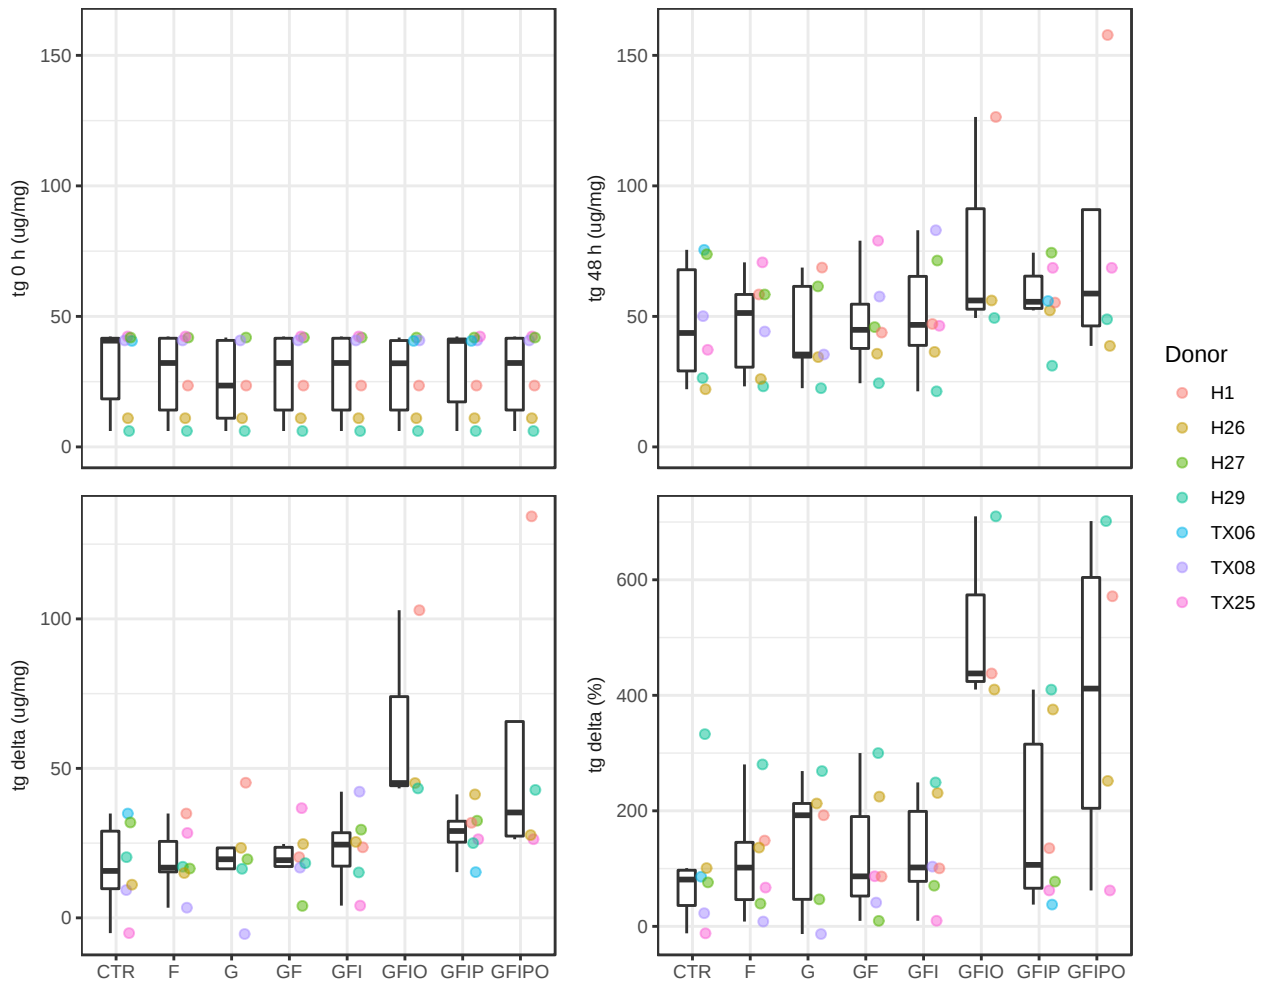

```

ggsave("plots/Fig1._Intracellular_triglyceride_content_of_human_samples.pdf",
       width = 9,
       height = 7)

```

```

ggsave("plots_png/Fig1._Intracellular_triglyceride_content_of_human_samples.png",
       width = 9,
       height = 7)

```

Figure 2. Sequencing metrics from RNASeq data analysis

```
plot_reads_stacked_bar <- function(qc_metrics_df) {
  df_to_plot <- qc_metrics_df %>%
    mutate(
      pct_exonic_bases = (CODING_BASES + UTR_BASES) / PF_ALIGNED_BASES,
      est_num_exonic_reads = pct_exonic_bases * PF_HQ_ALIGNED_READS,
      "Pass filter" = PF_READS / 2 / 10^6,
      "Mapped" = PF_READS_ALIGNED / 2 / 10^6,
      "Uniquely mapped" = PF_HQ_ALIGNED_READS / 2 / 10^6,
      "Uniquely mapped to exons" = est_num_exonic_reads / 2 / 10^6) %>%
    select(
      sample_name,
      "Pass filter",
      "Mapped",
      "Uniquely mapped",
      "Uniquely mapped to exons"
    ) %>%
    pivot_longer(
      cols = c(
        "Pass filter",
        "Mapped",
        "Uniquely mapped",
        "Uniquely mapped to exons"
      ),
      names_to = "type"
    ) %>%
    mutate(type = factor(
      type,
      levels = c(
        "Pass filter",
        "Mapped",
        "Uniquely mapped",
        "Uniquely mapped to exons"
      )
    )) %>%
    separate(sample_name,
      into = c("condition", "timepoint", "donor_id"),
      sep = "_",
      remove = FALSE)

  df_to_plot %>%
    ggplot(aes(x = donor_id, y = value, fill = type)) +
    geom_bar(stat = "identity",
      position = "identity",
      alpha = 0.8,
      width = 1) +
    ylab("Millions of read pairs") +
    xlab("Sample") +
    theme_bw() +
    labs(fill = "Type") +
    ggh4x::facet_nested(~condition + timepoint,
      scales = "free_x",
      nest_line = TRUE,
```

```

        switch = "x",
        resect = unit(0.1, "in")
    ) +
  theme(axis.text.x = element_text(angle = 60, hjust = 1),
        strip.background = element_blank(),
        strip.placement = "outside",
        panel.border = element_blank(),
        panel.background = element_blank(),
        panel.grid.major.x = element_blank(),
        panel.grid.major.y = element_line(linetype = "dashed", size = 0.3),
        panel.grid.minor.y = element_line(linetype = "dashed", size = 0.3),
        panel.ontop = TRUE
    ) +
  coord_cartesian(ylim = c(0, 90), expand = FALSE) +
  scale_y_continuous(breaks = scales::pretty_breaks(n = 11))
}

```

```

p1 <- plot_reads_stacked_bar(rnaseq_qc_human) +
  ggtitle("Human")

p2 <- plot_reads_stacked_bar(rnaseq_qc_mouse) +
  ggtitle("Mouse")

p1 / p2 + plot_layout(guides = "collect") &
  theme(legend.position = 'bottom')

```

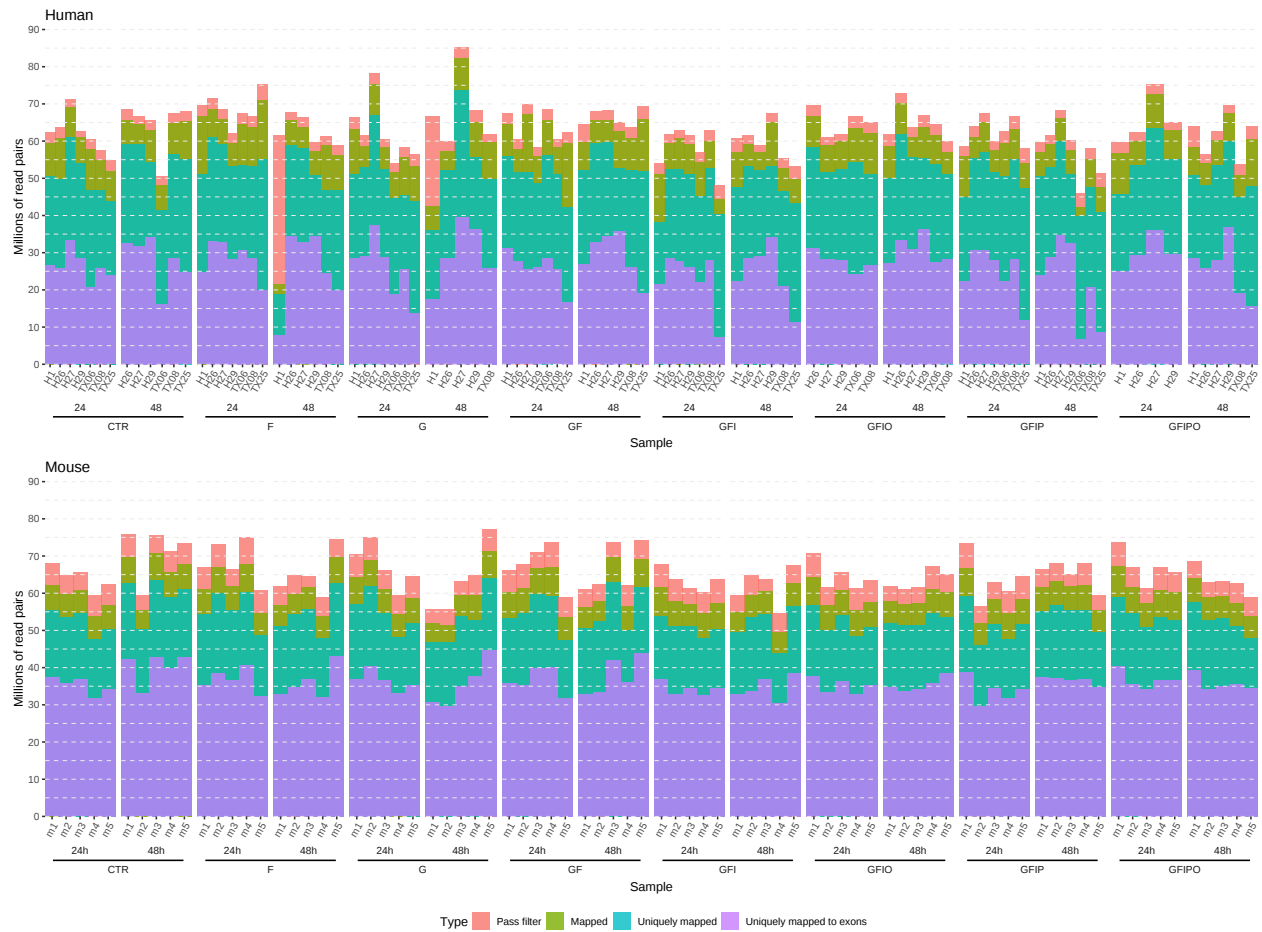

```
ggsave("plots/Fig_2._Sequencing_metrics_from_RNASeq_data_analysis.pdf",
       width = 16,
       height = 12)
```

```
ggsave("plots_png/Fig_2._Sequencing_metrics_from_RNASeq_data_analysis.png",
       width = 16,
       height = 12)
```



Figure 3. Principal Component Analysis

```
## do PCA
pca_human <- prcomp(t(norm_counts_human), scale. = TRUE)
pca_mouse <- prcomp(t(norm_counts_mouse), scale. = TRUE)

## calculate % variance explained
hPcv <- (pca_human$sdev^2/sum(pca_human$sdev^2))*100
names(hPcv) <- paste0("PC", 1:length(hPcv))

mPcv <- (pca_mouse$sdev^2/sum(pca_mouse$sdev^2))*100
names(mPcv) <- paste0("PC", 1:length(mPcv))

## prepare PCA results for ggplot
hPca.df <-
  left_join(
    pca_human$x %>%
      as.data.frame() %>%
      rownames_to_column("sampleId"),
    sample_sheet_human %>%
      mutate(group = str_remove(Group, "Liver_PCLS_") %>%
              str_replace("_", " "),
             timepoint = ifelse(incubation_time_h == 24, "24 h", "48 h")) %>%
      select(sampleId, sample_name, group, incubation_medium, timepoint, donor_id)
  )

mPca.df <-
  left_join(
    pca_mouse$x %>%
      as.data.frame() %>%
      rownames_to_column("sampleId"),
    sample_sheet_mouse %>%
      mutate(group = str_remove(Group, "Liver_PCLS_") %>%
              str_replace("_", " "),
             timepoint = ifelse(timepoint == "24h", "24 h", "48 h")) %>%
      select(sampleId, sample_name, group, incubation_medium = treatment, timepoint,
             animal_id)
  )

### PC1 vs PC2
hPc1.pc2 <- hPca.df %>%
  ggplot(aes(x = PC1, y = PC2, color = incubation_medium, shape = timepoint)) +
  geom_point(size = 2) +
  scale_shape_manual(values = 1:2) +
  ggrepel::geom_text_repel(aes(label = ifelse(PC1 > 200, sample_name, "")),
                           size = 3) +
  xlab(paste0("PC1 (", round(hPcv["PC1"], digits = 2), "%)")) +
  ylab(paste0("PC2 (", round(hPcv["PC2"], digits = 2), "%)")) +
  theme_bw() +
  ggtitle("Human") +
  labs(color = "Incubation medium", shape = "Incubation time") +
  coord_fixed(ratio = 1)
```

```

mPc1.pc2 <- mPca.df %>%
  ggplot(aes(x = PC1, y = PC2, color = incubation_medium, shape = timepoint)) +
  geom_point(size = 2) +
  scale_shape_manual(values = 1:2) +
  xlab(paste0("PC1 (", round(mPcv["PC1"], digits = 2), " %)") +
  ylab(paste0("PC2 (", round(mPcv["PC2"], digits = 2), " %)") +
  theme_bw() +
  ggtitle("Mouse") +
  labs(color = "Incubation medium", shape = "Incubation time") +
  coord_fixed(ratio = 1) +
  theme(legend.position = "none")

```

### ### PC1 vs PC3

```

hPc1.pc3 <- hPca.df %>%
  ggplot(aes(x = PC1, y = PC3, color = incubation_medium, shape = timepoint)) +
  geom_point(size = 2) +
  scale_shape_manual(values = 1:2) +
  ggrepel::geom_text_repel(aes(label = ifelse(PC1 > 200, sample_name, "")),
    size = 3) +
  xlab(paste0("PC1 (", round(hPcv["PC1"], digits = 2), " %)") +
  ylab(paste0("PC3 (", round(hPcv["PC3"], digits = 2), " %)") +
  theme_bw() +
  ggtitle("Human") +
  labs(color = "Incubation medium", shape = "Incubation time") +
  coord_fixed(ratio = 1)

```

```

mPc1.pc3 <- mPca.df %>%
  ggplot(aes(x = PC1, y = PC3, color = incubation_medium, shape = timepoint)) +
  geom_point(size = 2) +
  scale_shape_manual(values = 1:2) +
  xlab(paste0("PC1 (", round(mPcv["PC1"], digits = 2), " %)") +
  ylab(paste0("PC3 (", round(mPcv["PC3"], digits = 2), " %)") +
  theme_bw() +
  ggtitle("Mouse") +
  labs(color = "Incubation medium", shape = "Incubation time") +
  coord_fixed(ratio = 1) +
  theme(legend.position = "none")

```

### ### PC2 vs PC3

```

hPc2.pc3 <- hPca.df %>%
  ggplot(aes(x = PC2, y = PC3, color = incubation_medium, shape = timepoint)) +
  geom_point(size = 2) +
  scale_shape_manual(values = 1:2) +
  ggrepel::geom_text_repel(aes(label = ifelse(PC3 > 200, sample_name, "")),
    size = 3) +
  xlab(paste0("PC2 (", round(hPcv["PC2"], digits = 2), " %)") +
  ylab(paste0("PC3 (", round(hPcv["PC3"], digits = 2), " %)") +
  theme_bw() +
  ggtitle("Human") +
  labs(color = "Incubation medium", shape = "Incubation time") +
  coord_fixed(ratio = 1)

```

```

mPc2.pc3 <- mPca.df %>%

```

```

ggplot(aes(x = PC2, y = PC3, color = incubation_medium, shape = timepoint)) +
  geom_point(size = 2) +
  scale_shape_manual(values = 1:2) +
  xlab(paste0("PC2 (", round(mPcv["PC2"], digits = 2), "%)")) +
  ylab(paste0("PC3 (", round(mPcv["PC3"], digits = 2), "%)")) +
  theme_bw() +
  ggtitle("Mouse") +
  labs(color = "Incubation medium", shape = "Incubation time") +
  coord_fixed(ratio = 1) +
  theme(legend.position = "none")

```

```

p12 <- hPc1.pc2 + mPc1.pc2
p13 <- hPc1.pc3 + mPc1.pc3
p23 <- hPc2.pc3 + mPc2.pc3

```

```

(p12 / p13 / p23) + plot_layout(guides = "collect")

```

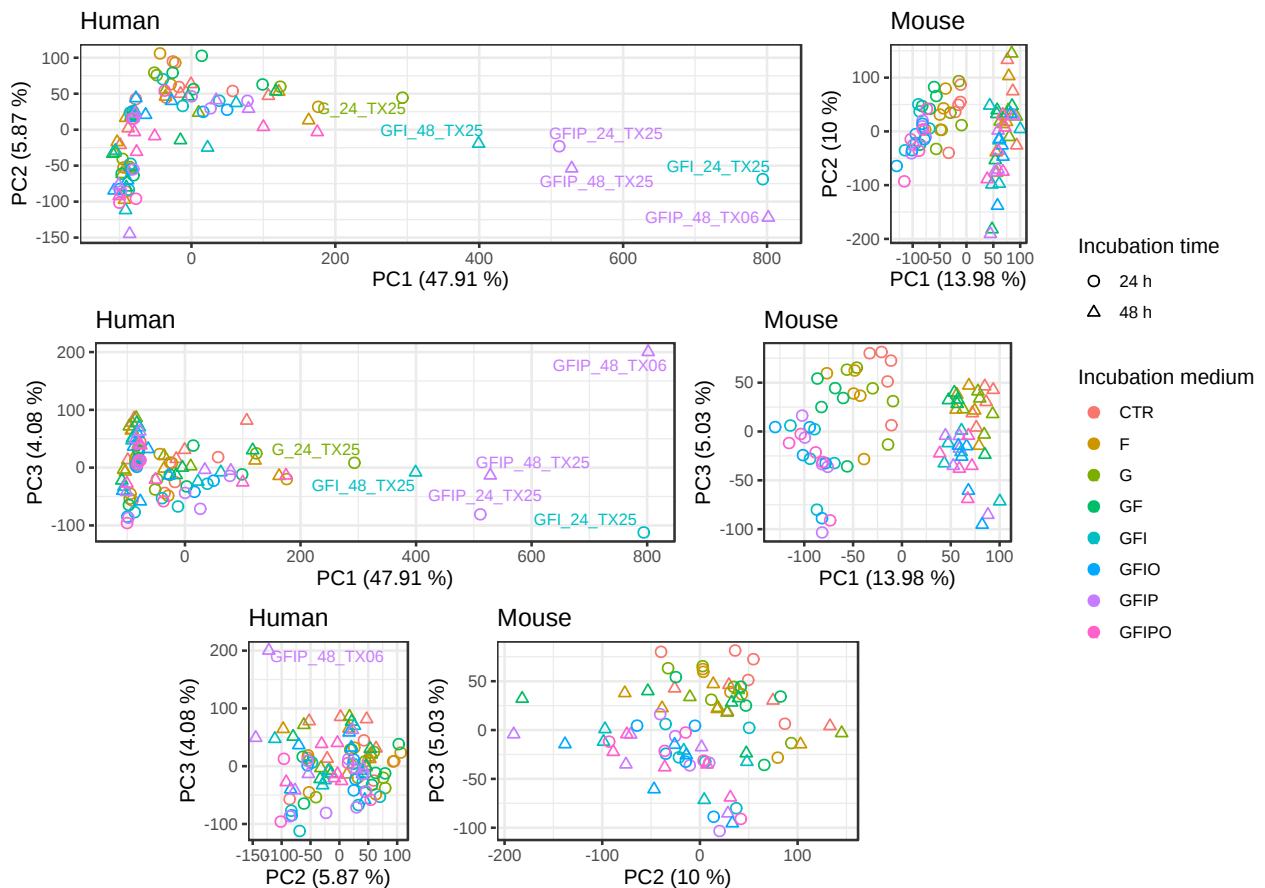

```

ggsave("plots/Fig_3._Principal_Component_Analysis.pdf",
  width = 10,
  height = 7)

```

```

ggsave("plots_png/Fig_3._Principal_Component_Analysis.png",
  width = 10,
  height = 7)

```

Figure 4. Hierarchical clustering

```
## compute hierarchical clustering
hHc <- hclust(dist(t(norm_counts_human)))
hHc$labels <- data.frame(sampleId = hHc$labels) %>%
  left_join(sample_sheet_human) %>%
  pull(sample_name)

mHc <- hclust(dist(t(norm_counts_mouse)))
mHc$labels <- data.frame(sampleId = mHc$labels) %>%
  left_join(sample_sheet_mouse) %>%
  pull(sample_name)

## human dendrogram
p1 <- ggplotify::as.ggplot(~{
  timepoint_color <- ifelse(str_detect(hHc$labels, "24"), "#dddddd", "#999999")
  timepoint_map <- c("24 h" = "#dddddd", "48 h" = "#999999")

  group <- hHc$labels %>% str_split("_") %>% map_chr(function(x) x[1])
  group_color <- group %>% network::as.color()
  group_color <- RColorBrewer::brewer.pal(9, "Blues")[2:9][group_color]
  names(group_color) <- group
  group_map <- group_color[unique(group)]

  donor <- hHc$labels %>% str_split("_") %>% map_chr(function(x) x[3])
  donor_color <- donor %>% network::as.color()
  donor_color <- palette_cat_16[donor_color]
  names(donor_color) <- donor
  donor_map <- donor_color[unique(donor)]

  colorBars <- cbind(timepoint_color, group_color, donor_color)

  hHc$labels <- hHc$labels %>% str_replace_all("_", " ")

  par(mar = c(8.5, 1, 3, 0) + 0.1)

  dend_h <- hHc %>% as.dendrogram()

  plot(dend_h, horiz = FALSE, main = "Human")

  ## add color bar annotations
  dendextend::colored_bars(colors = colorBars,
                           dend = dend_h,
                           rowLabels = c("Timepoint", "Group", "Donor"),
                           horiz = FALSE)

  ## add legends
  legend(
    title = "Timepoint",
    x = "topright",
    legend = names(timepoint_map),
    pch = 15,
    pt.cex = 1.5,
    bty = 'n',
```

```

x.intersp = 0.3,
inset = c(0.14, 0.02), # place outside
title.adj = 0.69,
text.width = 1,
col = timepoint_map
)

legend(
  title = "Donor",
  x = "topright",
  legend = names(donor_map),
  pch = 15,
  pt.cex = 1.5,
  bty = 'n',
  x.intersp = 0.3,
  inset = c(0.1, 0.02),
  title.adj = 0.61,
  text.width = 1,
  col = donor_map
)

legend(
  title = "Group",
  x = "topright",
  legend = names(group_map),
  pch = 15,
  pt.cex = 1.5,
  bty = 'n',
  x.intersp = 0.3,
  inset = c(0.05, 0.02),
  title.adj = 0.64,
  text.width = 1,
  col = group_map
)
})

## mouse dendrogram
p2 <- ggplotify::as.ggplot(~{
  timepoint_color <- ifelse(str_detect(mHc$labels, "24"), "#dddddd", "#999999")
  timepoint_map <- c("24 h" = "#dddddd", "48 h" = "#999999")

  group <- mHc$labels %>% str_split("_") %>% map_chr(function(x) x[1])
  group_color <- group %>% network::as.color()
  group_color <- RColorBrewer::brewer.pal(9, "Blues")[2:9][group_color]
  names(group_color) <- group
  group_map <- group_color[unique(group)]

  donor <- mHc$labels %>% str_split("_") %>% map_chr(function(x) x[3])
  donor_color <- donor %>% network::as.color()
  donor_color <- palette_cat_16[donor_color]
  names(donor_color) <- donor
  donor_map <- donor_color[unique(donor)]

```

```

color_bars <- cbind(timepoint_color, group_color, donor_color)

mHc$labels <- mHc$labels %>% str_replace_all("_", " ")

par(mar = c(8.5, 1, 3, 0) + 0.1)

dend_h <- mHc %>% as.dendrogram()

plot(dend_h, horiz = FALSE, main = "Mouse")

## add color bar annotations
dendextend::colored_bars(colors = color_bars,
                        dend = dend_h,
                        rowLabels = c("Timepoint", "Group", "Donor"),
                        horiz = FALSE)

## add legend
legend(
  title = "Donor",
  x = "topright",
  legend = names(donor_map),
  pch = 15,
  pt.cex = 1.5,
  bty = 'n',
  x.intersp = 0.3,
  inset = c(0.05, 0.02),
  title.adj = 0.6,
  text.width = 1,
  col = donor_map
)
})

p1 / p2

```

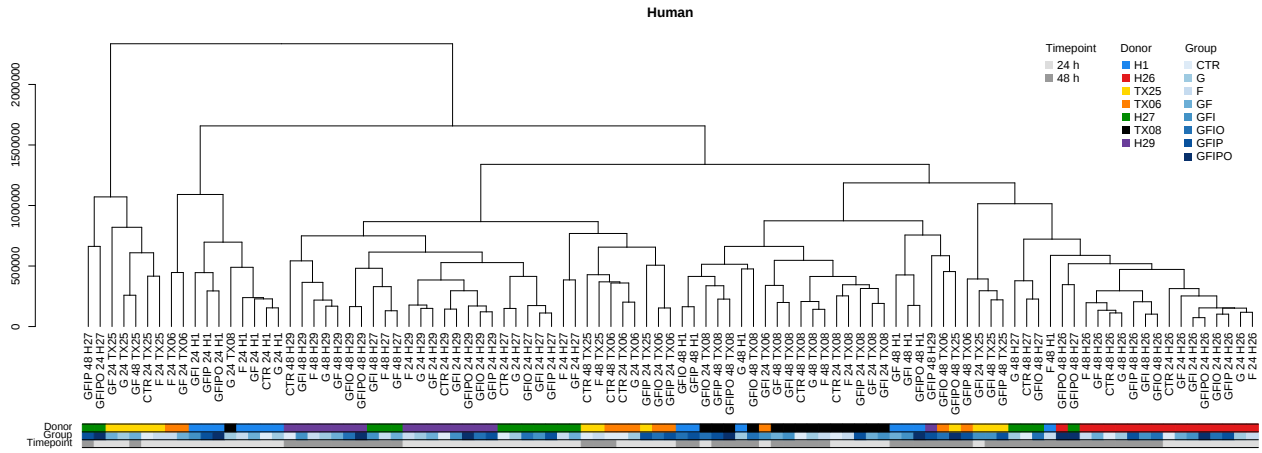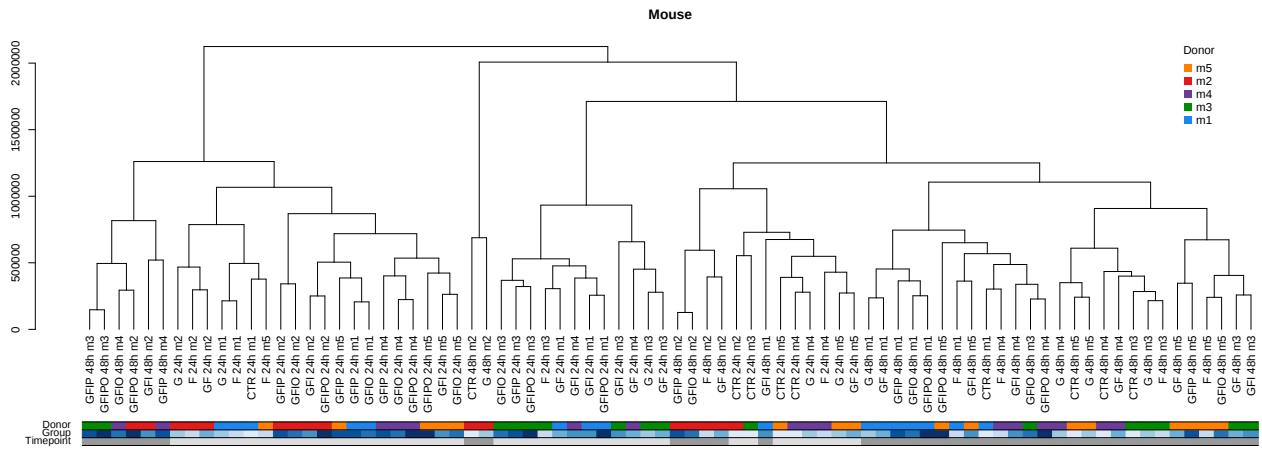

```
ggsave("plots/Fig_4._Hierarchical_clustering.pdf",
  width = 20,
  height = 14)
```

```
ggsave("plots_png/Fig_4._Hierarchical_clustering.png",
  width = 20,
  height = 14)
```

Figure 5. Human vs. mouse gene expression correlation

```
set.seed(42)
orthologs_1to1_expressed <- intersect(
  intersect(rownames(norm_counts_human), orthologs_1to1$human_ensgid),
  filter(
    orthologs_1to1,
    mouse_ensgid %in% intersect(rownames(norm_counts_mouse),
                                orthologs_1to1$mouse_ensgid)
  ) %>%
  pull("human_ensgid")
)

med_normCounts_per_group_h <- sample_sheet_human %>%
  pull(Group) %>%
  unique() %>%
  set_names() %>%
  map_dfc(function(.x) {
    samples <- sample_sheet_human %>% filter(Group == .x) %>% pull(sampleId)
    norm_counts_human[, samples] %>%
      rowMedians()
  }) %>%
  mutate(ensgid = rownames(norm_counts_human)) %>%
  filter(ensgid %in% orthologs_1to1_expressed) %>%
  arrange(ensgid) %>%
  column_to_rownames("ensgid")

med_normCounts_per_group_m <- sample_sheet_human %>%
  pull(Group) %>%
  unique() %>%
  set_names() %>%
  map_dfc(function(.x) {
    samples <- sample_sheet_mouse %>% filter(Group == .x) %>% pull(sampleId)
    norm_counts_mouse[, samples] %>%
      rowMedians()
  }) %>%
  mutate(ensgid = rownames(norm_counts_mouse)) %>%
  inner_join(orthologs_1to1, by = c(ensgid = "mouse_ensgid")) %>%
  filter(human_ensgid %in% orthologs_1to1_expressed) %>%
  select(-ensgid, -global_identity_perc) %>%
  arrange(human_ensgid) %>%
  column_to_rownames("human_ensgid")

stopifnot(rownames(med_normCounts_per_group_h) == rownames(med_normCounts_per_group_m))

dfc <- full_join(
  med_normCounts_per_group_h %>%
    rownames_to_column("gene") %>%
    pivot_longer(cols = -gene, names_to = "group", values_to = "med_expr_human"),
  med_normCounts_per_group_m %>%
    rownames_to_column("gene") %>%
    pivot_longer(cols = -gene, names_to = "group", values_to = "med_expr_mouse"),
```



```

by = c("gene", "group")
) %>%
  filter(med_expr_human > 0, med_expr_mouse > 0)

p1 <- dfc %>%
  ggplot(aes(x = med_expr_human, y = med_expr_mouse)) +
  geom_point(alpha = 0.2, shape = 1) +
  geom_smooth(method = "lm") +
  ggpubr::stat_cor(aes(x = med_expr_human, y = med_expr_mouse,
    label = ..r.label..),
    cor.coef.name = "R",
    digits = 3, method = "pearson", color = "darkblue") +
  ggpubr::stat_cor(aes(x = med_expr_human, y = med_expr_mouse,
    label = ..r.label..),
    cor.coef.name = "rho",
    digits = 3, method = "spearman", label.y.npc = 0.8) +
  facet_wrap(~ group) +
  theme_bw() +
  labs(x = "Median expression in human",
    y = "Median expression in mouse") +
  scale_y_log10(labels = scales::label_number_si()) +
  scale_x_log10(labels = scales::label_number_si()) +
  theme(strip.background = element_blank(),
    axis.text.x = element_text(angle = 60, hjust = 1))

## Check how many genes are not found in the 1to1 orthologs table

# sum(!orthologs_1to1$human_ensgid %in% rownames(norm_counts_human)) # 324
# sum(!orthologs_1to1$mouse_ensgid %in% rownames(norm_counts_mouse)) # 1023
# sum(
#   !orthologs_1to1$human_ensgid %in% rownames(norm_counts_human) |
#   !orthologs_1to1$mouse_ensgid %in% rownames(norm_counts_mouse)
# ) # 1216

if (file.exists("input_files/orthologs_correlation.tsv")) {
  orthologs_expressed <- read_tsv("input_files/orthologs_correlation.tsv")
} else {
  ## get 1to1 orthologs between mouse and human
  orthologs_expressed <-
    orthologs_1to1 %>% filter(
      human_ensgid %in% rownames(norm_counts_human),
      mouse_ensgid %in% rownames(norm_counts_mouse)
    )

  orthologs_expressed <- orthologs_expressed %>% mutate(cor_pearson = NA_real_)

  # Iterate over genes
  for (row in 1:nrow(orthologs_expressed)) {
    human_gene <- orthologs_expressed$human_ensgid[row]
    mouse_gene <- orthologs_expressed$mouse_ensgid[row]

    ## Create vector of median per group expressions of current gene in human
    med_expr_h <- c()
    for (group in unique(sample_sheet_human$Group)) {

```

```

samples <- sample_sheet_human %>%
  filter(Group == group) %>%
  pull(sampleId)

med_expr_h <- c(med_expr_h, median(norm_counts_human[human_gene, samples]))
}

## Create vector of median per group expressions of current gene in mouse
med_expr_m <- c()
for (group in unique(sample_sheet_human$Group)) {
  samples <- sample_sheet_mouse %>%
    filter(Group == group) %>%
    pull(sampleId)
  med_expr_m <- c(med_expr_m, median(norm_counts_mouse[mouse_gene, samples]))
}

## calculate pearson correlation between vectors of median per group
## expressions of current gene in human and mouse
orthologs_expressed[row, "cor_pearson"] <-
  cor(med_expr_h, med_expr_m, method = "pearson")
}
write_tsv(orthologs_expressed, "input_files/orthologs_correlation.tsv")
}

## 1964 genes had standard deviation = 0 and thus correlation is NA
p2 <- ggplot(orthologs_expressed,
  aes(x=global_identity_perc,
      y=cor_pearson)) +
  geom_point(alpha = 0.1, size = 0.7) +
  theme_bw() +
  ylab("Pearson correlation coefficient") +
  xlab("Global sequence identity (%)") +
  coord_cartesian(xlim = c(0, 101), ylim = c(-1, 1), expand = FALSE)

p1 + p2 +
  plot_annotation(tag_levels = 'A')

```

A

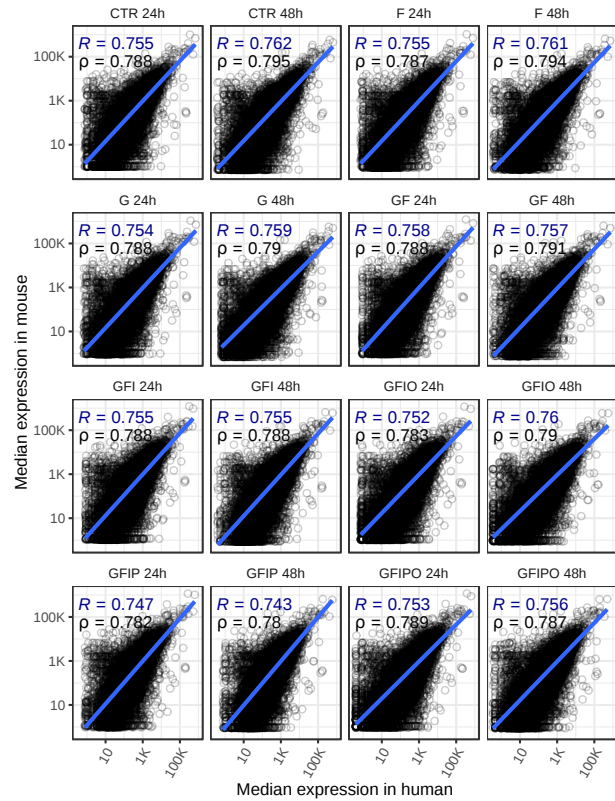

B

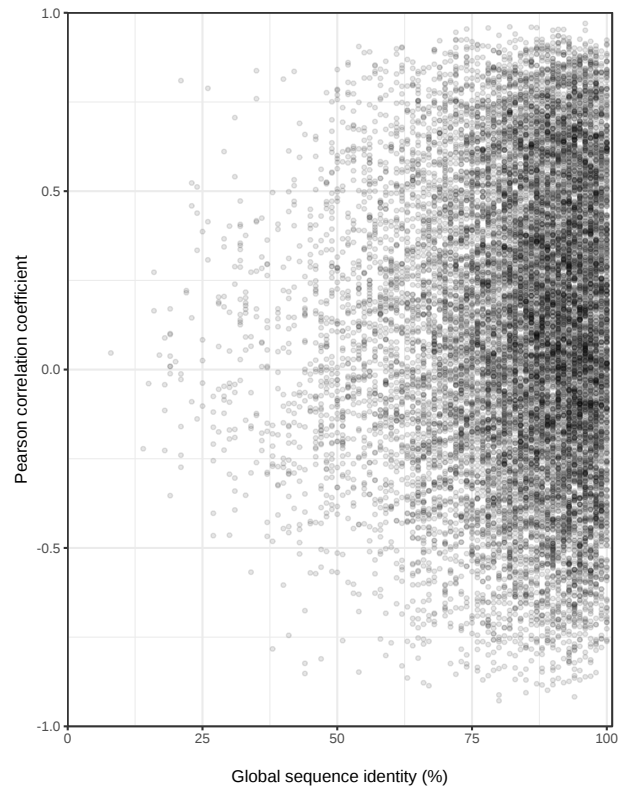

```
ggsave("plots/Fig_5._Human_vs._mouse_gene_expression_correlation.pdf",
       width = 12,
       height = 8)
```

```
ggsave("plots_png/Fig_5._Human_vs._mouse_gene_expression_correlation.png",
       width = 12,
       height = 8)
```

Figure 6. Top regulated genes based on experimental design

```
## Read additional pipeline output containing various analyses of DEGs
conf_level <- "95"

hitfile_human <- paste(hitfile_path_human, conf_level,
                       "Confidence_results_human_proteins.txt", sep = "")

hitfile_mouse <- paste(hitfile_path_mouse, conf_level,
                       "Confidence_results_human_proteins.txt", sep = "")

hitdata_human <- read_tsv(hitfile_human, col_names = TRUE)
hitdata_mouse <- read_tsv(hitfile_mouse, col_names = TRUE)

# Pairwise Comparisons
# 1 - G 24h vs. CTR 24h
# 2 - F 24h vs. CTR 24h
# 3 - GF 24h vs. CTR 24h
# 4 - GFI 24h vs. CTR 24h
# 5 - GFIO 24h vs. CTR 24h
# 6 - GFIP 24h vs. CTR 24h
# 7 - GFIPO 24h vs. CTR 24h
# 8 - G 48h vs. CTR 48h
# 9 - F 48h vs. CTR 48h
# 10 - GF 48h vs. CTR 48h
# 11 - GFI 48h vs. CTR 48h
# 12 - GFIO 48h vs. CTR 48h
# 13 - GFIP 48h vs. CTR 48h
# 14 - GFIPO 48h vs. CTR 48h
# 15 - CTR 48h vs. CTR 24h
# 16 - G 48h vs. G 24h
# 17 - F 48h vs. F 24h
# 18 - GF 48h vs. GF 24h
# 19 - GFI 48h vs. GFI 24h
# 20 - GFIO 48h vs. GFIO 24h
# 21 - GFIP 48h vs. GFIP 24h
# 22 - GFIPO 48h vs. GFIPO 24h

dh <- hitdata_human
dm <- hitdata_mouse
d <- dh %>% left_join(dm,
                     by = c("human_ensgid" = "human_ensgid...1"),
                     suffix = c(".h", ".m"))
## 4956 DEGs matched between human and mouse

d0 <- tibble(
  ensgid = d$human_ensgid,
  mouse_ensgid = d$homology_ensgid,
  flag_next_homolog = d$flag_next_homolog,
  flag_one2one = d$flag_one2one,
  gene_symbol = d$best_gene_name_ensembl.h,
  biotype = ifelse(d$target_class_prio.h > 0, "protein", "other"),

# Human
```

```

## For each DEG sum scores (logRatio * -log10padj) across contrasts
sum_score_h = d$`1_dge_score_Limma_model` (CGET).h` +
  d$`2_dge_score_Limma_model` (CGET).h` +
  d$`3_dge_score_Limma_model` (CGET).h` +
  d$`4_dge_score_Limma_model` (CGET).h` +
  d$`5_dge_score_Limma_model` (CGET).h` +
  d$`6_dge_score_Limma_model` (CGET).h` +
  d$`7_dge_score_Limma_model` (CGET).h` +
  d$`8_dge_score_Limma_model` (CGET).h` +
  d$`9_dge_score_Limma_model` (CGET).h` +
  d$`10_dge_score_Limma_model` (CGET).h` +
  d$`11_dge_score_Limma_model` (CGET).h` +
  d$`12_dge_score_Limma_model` (CGET).h`,

## For each DEG sum positive (+1) and negative (-1) signs of expression change
## across contrasts
sum_sign_h = d$`1_sign_Limma_model` (CGET).h` +
  d$`2_sign_Limma_model` (CGET).h` +
  d$`3_sign_Limma_model` (CGET).h` +
  d$`4_sign_Limma_model` (CGET).h` +
  d$`5_sign_Limma_model` (CGET).h` +
  d$`6_sign_Limma_model` (CGET).h` +
  d$`7_sign_Limma_model` (CGET).h` +
  d$`8_sign_Limma_model` (CGET).h` +
  d$`9_sign_Limma_model` (CGET).h` +
  d$`10_sign_Limma_model` (CGET).h` +
  d$`11_sign_Limma_model` (CGET).h` +
  d$`12_sign_Limma_model` (CGET).h`,

# Mouse
## For each DEG sum scores (logRatio * -log10padj) across contrasts
sum_score_m = d$`1_dge_score_Limma_model` (CGET).m` +
  d$`2_dge_score_Limma_model` (CGET).m` +
  d$`3_dge_score_Limma_model` (CGET).m` +
  d$`4_dge_score_Limma_model` (CGET).m` +
  d$`5_dge_score_Limma_model` (CGET).m` +
  d$`6_dge_score_Limma_model` (CGET).m` +
  d$`7_dge_score_Limma_model` (CGET).m` +
  d$`8_dge_score_Limma_model` (CGET).m` +
  d$`9_dge_score_Limma_model` (CGET).m` +
  d$`10_dge_score_Limma_model` (CGET).m` +
  d$`11_dge_score_Limma_model` (CGET).m` +
  d$`12_dge_score_Limma_model` (CGET).m`,

## For each DEG sum positive (+1) and negative (-1) signs of expression change
## across contrasts
sum_sign_m = d$`1_sign_Limma_model` (CGET).m` +
  d$`2_sign_Limma_model` (CGET).m` +
  d$`3_sign_Limma_model` (CGET).m` +
  d$`4_sign_Limma_model` (CGET).m` +
  d$`5_sign_Limma_model` (CGET).m` +
  d$`6_sign_Limma_model` (CGET).m` +
  d$`7_sign_Limma_model` (CGET).m` +

```

```

d$`8_sign_Limma_model (CGET).m` +
d$`9_sign_Limma_model (CGET).m` +
d$`10_sign_Limma_model (CGET).m` +
d$`11_sign_Limma_model (CGET).m` +
d$`12_sign_Limma_model (CGET).m`,

# Sum signs across species
sum_sign = sum_sign_h + sum_sign_m,
# Sum scores across species
sum_score = sum_score_h + sum_score_m,

# For each DEG sum the absolute values of difference between the human and mouse sign.
# Assigns: 0 if signs are the same, 2 if signs are opposite, 1 if the gene is shows
# change in only one of the species.
sum_diff_sign =
  abs(d$`1_sign_Limma_model (CGET).h` - d$`1_sign_Limma_model (CGET).m`) +
  abs(d$`2_sign_Limma_model (CGET).h` - d$`2_sign_Limma_model (CGET).m`) +
  abs(d$`3_sign_Limma_model (CGET).h` - d$`3_sign_Limma_model (CGET).m`) +
  abs(d$`4_sign_Limma_model (CGET).h` - d$`4_sign_Limma_model (CGET).m`) +
  abs(d$`5_sign_Limma_model (CGET).h` - d$`5_sign_Limma_model (CGET).m`) +
  abs(d$`6_sign_Limma_model (CGET).h` - d$`6_sign_Limma_model (CGET).m`) +
  abs(d$`7_sign_Limma_model (CGET).h` - d$`7_sign_Limma_model (CGET).m`) +
  abs(d$`8_sign_Limma_model (CGET).h` - d$`8_sign_Limma_model (CGET).m`) +
  abs(d$`9_sign_Limma_model (CGET).h` - d$`9_sign_Limma_model (CGET).m`) +
  abs(d$`10_sign_Limma_model (CGET).h` - d$`10_sign_Limma_model (CGET).m`) +
  abs(d$`11_sign_Limma_model (CGET).h` - d$`11_sign_Limma_model (CGET).m`) +
  abs(d$`12_sign_Limma_model (CGET).h` - d$`12_sign_Limma_model (CGET).m`)
)

# filter by one2one mapping mouse genes
d1 <- d0 %>% filter(
  flag_one2one == 1 & biotype == "protein"
)

p1 <- ggplot(d1, aes(x = sum_sign_h)) +
  geom_bar() +
  xlab("Sum of signs across contrasts treated vs. CTR (human)") +
  ylab("N human genes") +
  theme_bw()

p2 <- ggplot(d1, aes(x = sum_sign)) +
  geom_bar() +
  xlab("Sum of signs across contrasts treated vs. CTR (human + mouse)") +
  ylab("N human and mouse genes") +
  theme_bw()

p3 <- ggplot(d1, aes(x = sum_diff_sign)) +
  geom_bar() +
  xlab("Sum of differences in sign across contrasts treated vs. CTR (human - mouse)") +
  ylab("N human and mouse genes") +
  theme_bw()

```

```
p1 / p2 / p3 + plot_annotation(tag_levels = "A")
```

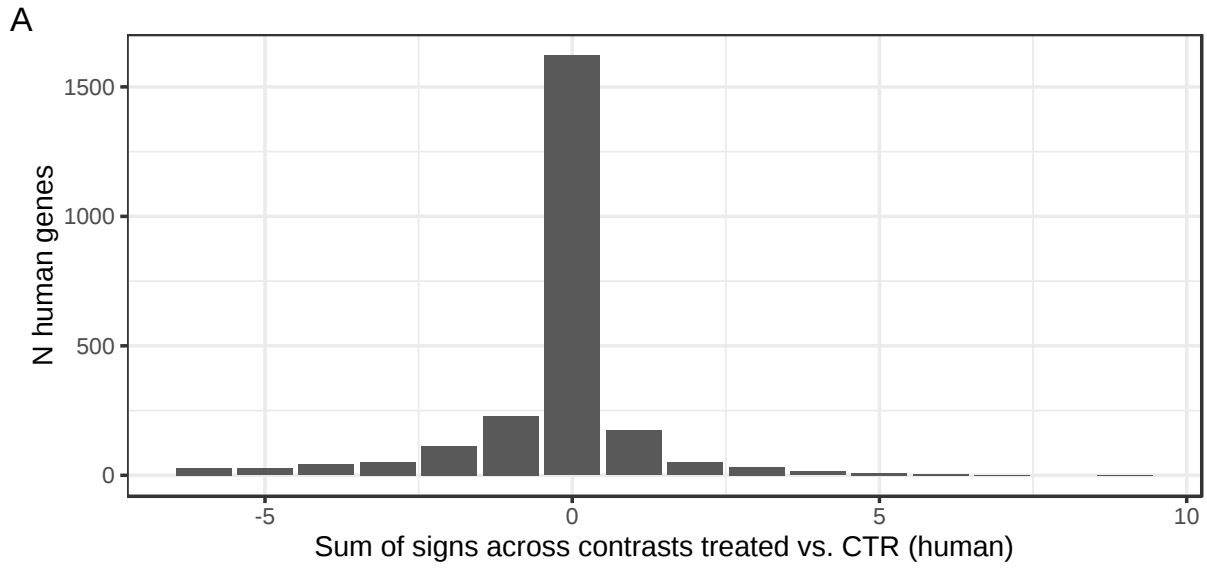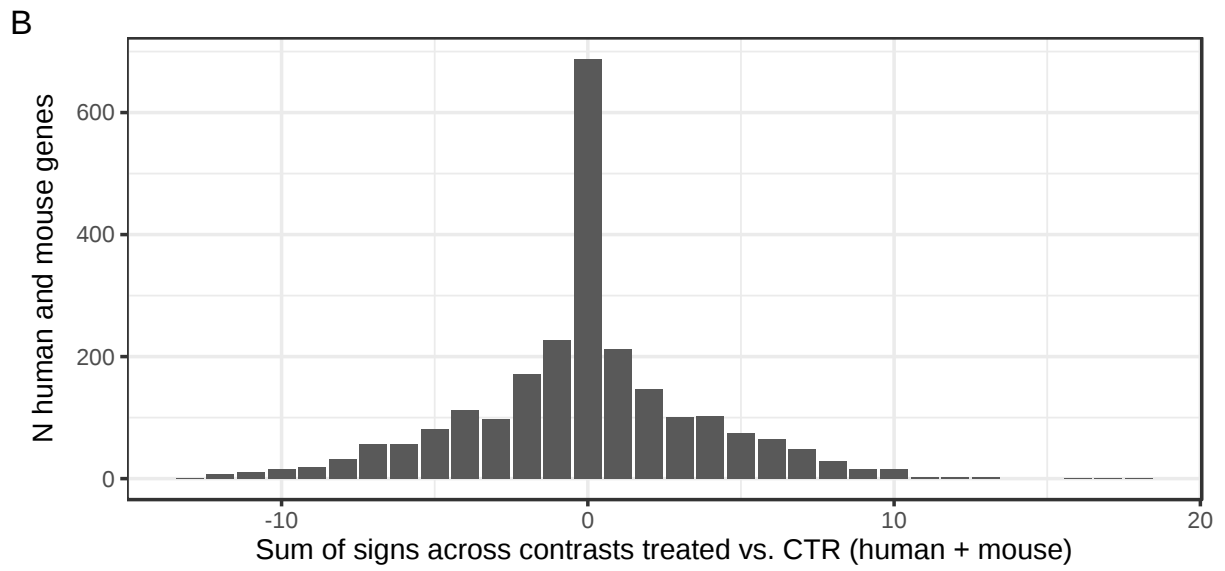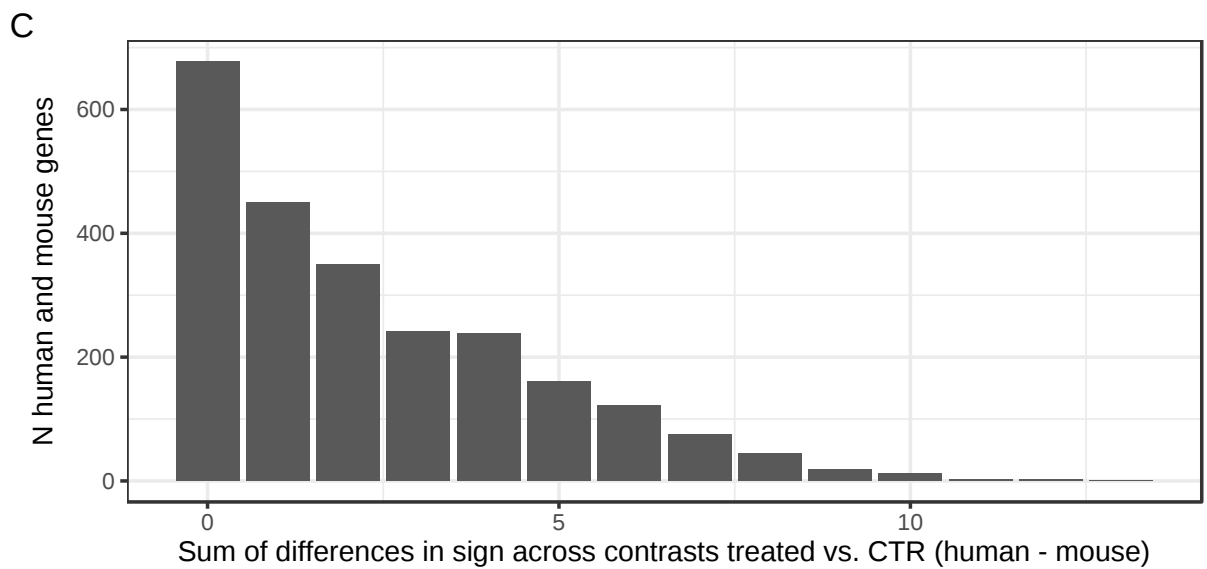



```
ggsave("plots/Fig_6._Top_regulated_genes_based_on_experimental_design.pdf",  
       width = 7,  
       height = 10)  
  
ggsave("plots_png/Fig_6._Top_regulated_genes_based_on_experimental_design.png",  
       width = 7,  
       height = 10)
```

Figure 7. Expression pattern of top correlated genes

```
tpm_human <-  
  loadRData(paste0(cgetd_path_human, "results/exprData/exprMatrix.Rdata")) %>%  
  assay("tpm")  
  
tpm_mouse <-  
  loadRData(paste0(cgetd_path_mouse, "results/exprData/exprMatrix.Rdata")) %>%  
  assay("tpm")  
  
cget_mapping_df <- bind_rows(  
  sample_sheet_human %>%  
    mutate(timepoint = if_else(incubation_time_h == "24", "24 h", "48 h")) %>%  
    select(cget_id = sampleId, Group, donor_id, timepoint),  
  sample_sheet_mouse %>%  
    mutate(timepoint = if_else(timepoint == "24h", "24 h", "48 h")) %>%  
    select(cget_id = sampleId, Group, donor_id = animal_id, timepoint)  
)  
  
plot_single_gene_expr <- function(human_ens_id, mouse_ens_id, gene_name) {  
  expression_df <- bind_rows(  
    data.frame(  
      tpm = tpm_human %>%  
        magrittr::extract(human_ens_id, ),  
      species = "human"  
    ),  
    data.frame(  
      tpm = tpm_mouse %>%  
        magrittr::extract(mouse_ens_id, ),  
      species = "mouse"  
    )  
  ) %>%  
  rownames_to_column("cget_id") %>%  
  left_join(cget_mapping_df, by = "cget_id") %>%  
  mutate(Group = factor(Group, levels = c(  
    "CTR 24h",  
    "F 24h",  
    "G 24h",  
    "GF 24h",  
    "GFI 24h",  
    "GFIO 24h",  
    "GFIP 24h",  
    "GFIP0 24h",  
  
    "CTR 48h",  
    "F 48h",  
    "G 48h",  
    "GF 48h",  
    "GFI 48h",  
    "GFIO 48h",  
    "GFIP 48h",  
    "GFIP0 48h"  
  )))
```

```

expression_df %>%
  ggplot(aes(y = Group, x = tpm)) +
  geom_boxplot(aes(color = timepoint)) +
  scale_y_discrete(limits = rev,
                  labels = ~str_remove(., "24h|48h")) +
  facet_wrap(~species,
            labeller = as_labeller(c(human = "Human",
                                    mouse = "Mouse")))) +

  theme_bw() +
  xlab("TPM") +
  labs(color = "Timepoint") +
  ggtitle(gene_name) +
  theme(axis.title.y = element_blank()) +
  theme(strip.background = element_blank()) +
  scale_x_continuous(breaks = scales::breaks_extended(n = 8))
}

```

```

p1 <- plot_single_gene_expr(
  human_ens_id = "ENSG00000166147",
  mouse_ens_id = "ENSMUSG00000027204",
  gene_name = "FBN1"
)

```

```

p2 <- plot_single_gene_expr(
  human_ens_id = "ENSG00000168542",
  mouse_ens_id = "ENSMUSG00000026043",
  gene_name = "COL3A1"
)

```

```

p1 + p2 + plot_layout(guides = "collect") + plot_annotation(tag_levels = "A")

```

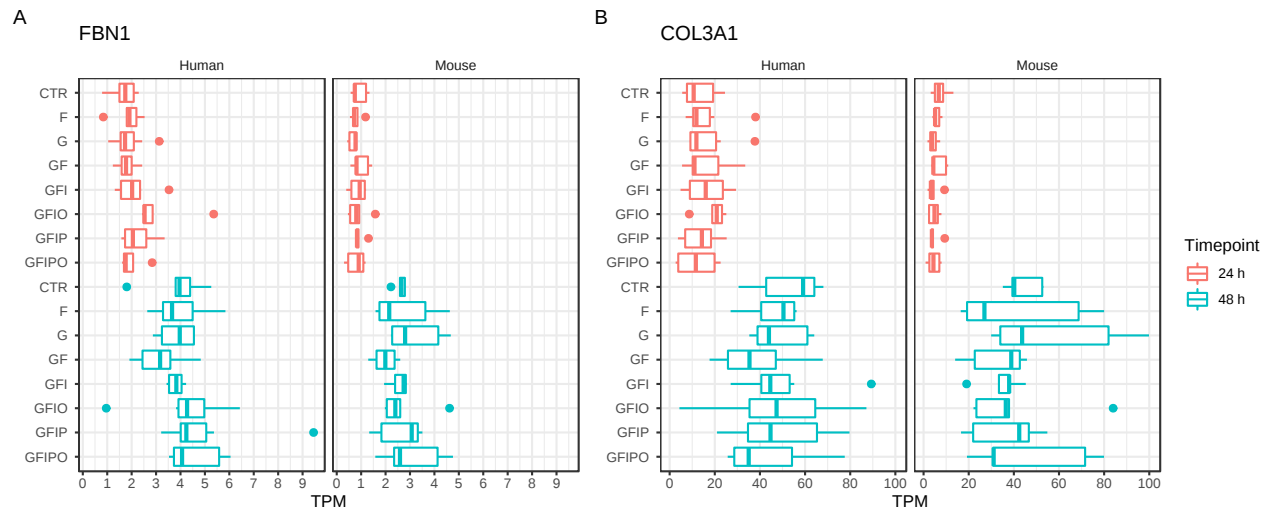

```

ggsave("plots/Fig_7_Expression_pattern_of_top_correlated_genes.pdf",
       width = 12,
       height = 5)

```

```

ggsave("plots_png/Fig_7_Expression_pattern_of_top_correlated_genes.png",
       width = 12,
       height = 5)

```

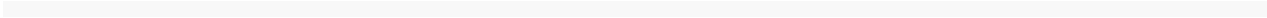

Figure 8. Expression pattern of top regulated genes

```

p1 <- plot_single_gene_expr(
  human_ens_id = "ENSG00000134363",
  mouse_ens_id = "ENSMUSG00000021765",
  gene_name = "FST"
)

p2 <- plot_single_gene_expr(
  human_ens_id = "ENSG00000140450",
  mouse_ens_id = "ENSMUSG00000042659",
  gene_name = "ARRDC4"
)

p1 + p2 + plot_layout(guides = "collect") + plot_annotation(tag_levels = "A")

```

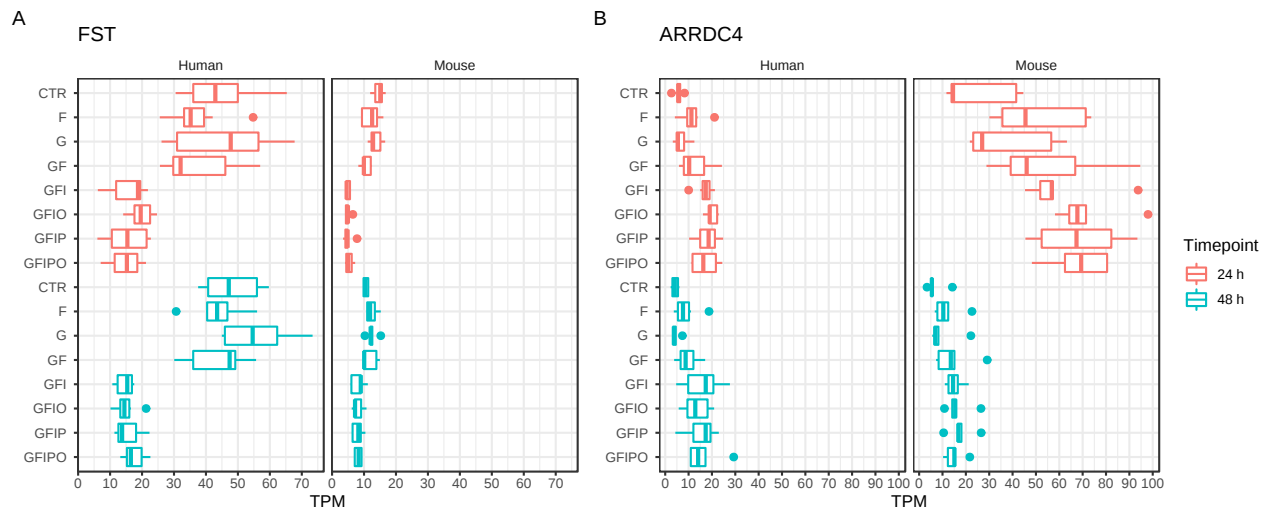

```

ggsave("plots/Fig_8_Expression_pattern_of_top_regulated_genes.pdf",
  width = 12,
  height = 5)

ggsave("plots_png/Fig_8_Expression_pattern_of_top_regulated_genes.png",
  width = 12,
  height = 5)

```

Figure 9. Expression pattern of top genes with species differences

```
p1 <- plot_single_gene_expr(
  human_ens_id = "ENSG00000135821",
  mouse_ens_id = "ENSMUSG00000026473",
  gene_name = "GLUL"
)

p2 <- plot_single_gene_expr(
  human_ens_id = "ENSG00000185567",
  mouse_ens_id = "ENSMUSG00000072812",
  gene_name = "AHNAK2"
)

p1 + p2 + plot_layout(guides = "collect") + plot_annotation(tag_levels = "A")
```

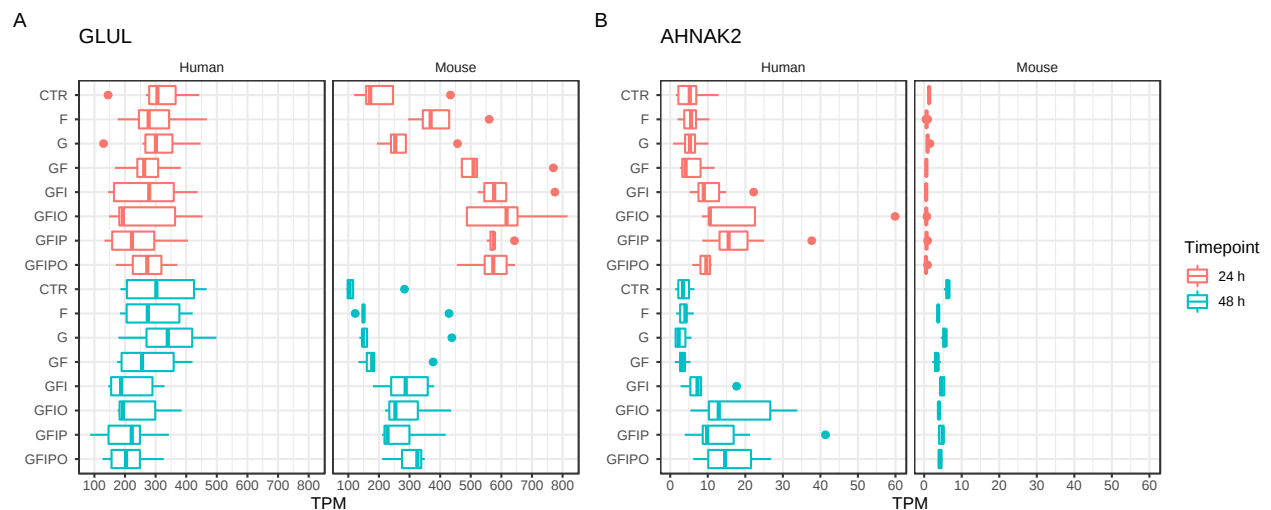

```
ggsave("plots/Fig_9_Expression_pattern_of_top_genes_with_species_differences.pdf",
  width = 12,
  height = 5)
```

```
ggsave("plots_png/Fig_9_Expression_pattern_of_top_genes_with_species_differences.png",
  width = 12,
  height = 5)
```



## Supplemental Figure S1. RNA quality and yield

```
p1 <- sample_sheet_human %>%
  ggplot(aes(x = Group, y = rin)) +
  geom_boxplot() +
  geom_beeswarm(aes(color = donor_id)) +
  geom_hline(yintercept = 7.5, color = "darkgray", linetype = "longdash") +
  ggtitle("Human") +
  ylab("RIN") +
  theme_bw() +
  theme(axis.text.x = element_text(angle = 60, hjust = 1),
        panel.grid.minor.y = element_blank()) +
  coord_cartesian(ylim = c(0, 10)) +
  scale_y_continuous(breaks = scales::breaks_extended(n = 11)) +
  labs(color = "Human donor") +
  theme(axis.title.x = element_blank(),
        axis.text.x = element_blank())
```

```
p2 <- sample_sheet_mouse %>%
  ggplot(aes(x = Group, y = rin)) +
  geom_boxplot(outlier.size = 0) +
  geom_beeswarm(aes(color = animal_id)) +
  geom_hline(yintercept = 7.5, color = "darkgray", linetype = "longdash") +
  ggtitle("Mouse") +
  ylab("RIN") +
  theme_bw() +
  theme(axis.text.x = element_text(angle = 60, hjust = 1),
        panel.grid.minor.y = element_blank()) +
  coord_cartesian(ylim = c(0, 10)) +
  scale_y_continuous(breaks = scales::breaks_extended(n = 11)) +
  labs(color = "Mouse donor") +
  theme(axis.title.y = element_blank(),
        axis.title.x = element_blank(),
        axis.text.x = element_blank())
```

```
p3 <- sample_sheet_human %>%
  ggplot(aes(x = Group, y = rna_concentration)) +
  geom_boxplot() +
  geom_beeswarm(aes(color = donor_id)) +
  ylab("RNA yield [ng/uL]") +
  theme_bw() +
  theme(axis.text.x = element_text(angle = 60, hjust = 1),
        panel.grid.minor.y = element_blank()) +
  scale_y_continuous(breaks = scales::breaks_extended(n = 11),
                    limits = c(0, 250)) +
  labs(color = "Human donor") +
  theme(axis.title.x = element_blank())
```

```
p4 <- sample_sheet_mouse %>%
  ggplot(aes(x = Group, y = rna_conc)) +
  geom_boxplot() +
  geom_beeswarm(aes(color = animal_id)) +
  ylab("RNA yield [ng/uL]") +
  theme_bw() +
  theme(axis.text.x = element_text(angle = 60, hjust = 1),
```



```

panel.grid.minor.y = element_blank()) +
scale_y_continuous(breaks = scales::breaks_extended(n = 11),
                  limits = c(0, 250)) +
labs(color = "Mouse donor") +
theme(axis.title.x = element_blank(),
      axis.title.y = element_blank())

```

```
(p1 + p2) / (p3 + p4) + plot_layout(guides = "collect")
```

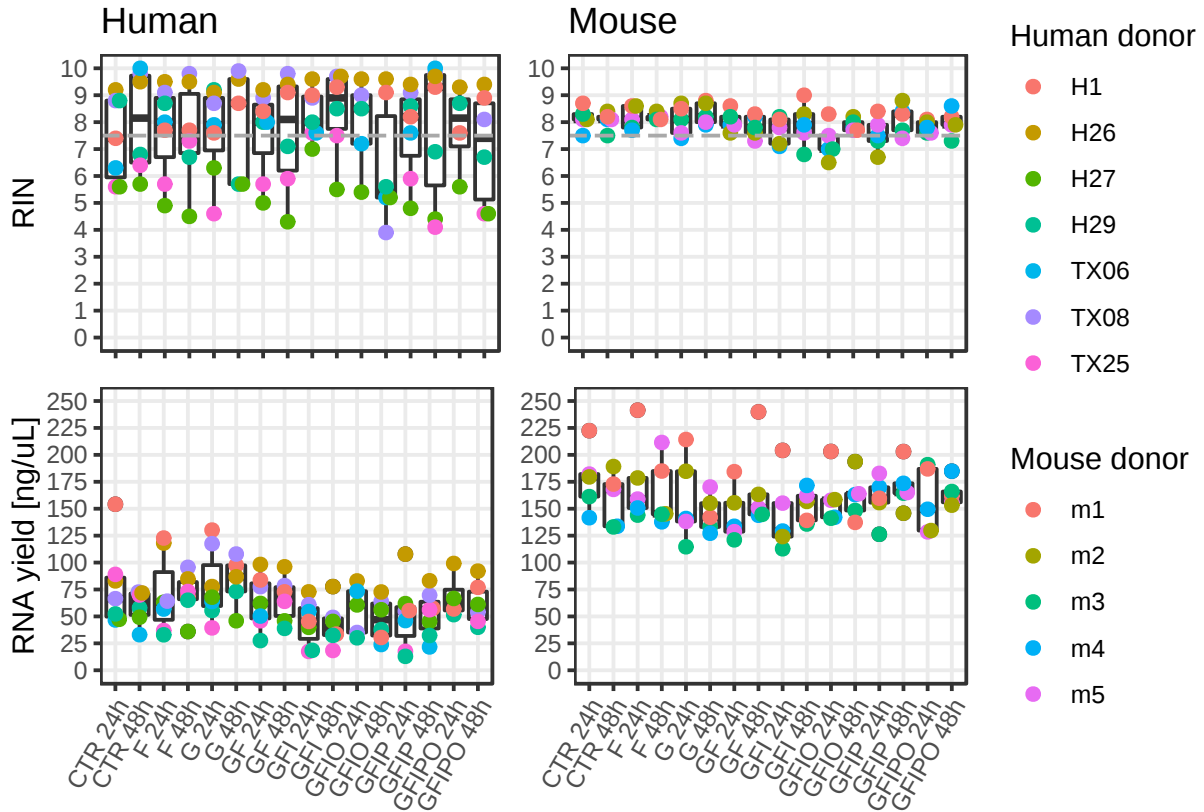

```
ggsave("plots/Supp_Fig_S1._RNA_quality_and_yield.pdf")
```

```
ggsave("plots_png/Supp_Fig_S1._RNA_quality_and_yield.png")
```

## Supplemental Figure S2. Gene Biotype

```
## Count genes per group excluding those that have normCount = 0 in all samples belonging  
## to the group.
```

```
detected_genes_h <- map(  
  .x = unique(sample_sheet_human$Group),  
  .f = function(.x) {  
    samples <- sample_sheet_human %>%  
      filter(Group == .x) %>%  
      pull(sampleId)  
  
    expr_subset_group <- norm_counts_human[ , samples]  
    expr_subset_group[rowSums(expr_subset_group) > 0, ] %>%  
      rownames()  
  }  
)  
names(detected_genes_h) <- unique(sample_sheet_human$Group)
```

```
detected_genes_m <- map(  
  .x = unique(sample_sheet_human$Group),  
  .f = function(.x) {  
    samples <- sample_sheet_mouse %>%  
      filter(Group == .x) %>%  
      pull(sampleId)  
  
    expr_subset_group <- norm_counts_mouse[ , samples]  
    expr_subset_group[rowSums(expr_subset_group) > 0, ] %>%  
      rownames()  
  }  
)  
names(detected_genes_m) <- unique(sample_sheet_human$Group)
```

```
## count genes by biotype
```

```
detected_genes_biotype_h <- detected_genes_h %>%  
  imap_dfr(  
    ~ tibble(ensgid = .x) %>%  
      left_join(gene_info_h, by = "ensgid") %>%  
      dplyr::count(biotype) %>%  
      mutate(Group = .y)  
  )
```

```
detected_genes_biotype_m <- detected_genes_m %>%  
  imap_dfr(  
    ~ tibble(ensgid = .x) %>%  
      left_join(gene_info_m, by = "ensgid") %>%  
      dplyr::count(biotype) %>%  
      mutate(Group = .y)  
  )
```

```
p1 <- detected_genes_biotype_h %>%  
  ggplot(aes(x = Group, y = n, fill = fct_reorder(biotype, n, .desc = TRUE))) +  
  geom_bar(stat = "identity", position = "stack") +  
  scale_fill_manual(values = palette_categorical,
```

```

      name = "Type (ordered by decreasing proportion)" +
theme_bw() +
theme(axis.text.x = element_text(angle = 60, hjust = 1)) +
ylab("Number of genes") +
ggtitle("Human") +
theme(axis.title.x = element_blank()) +
scale_y_continuous(breaks = scales::breaks_extended(n = 6),
                  limits = c(0, 60000)) +
coord_cartesian(expand = FALSE)

p2 <- detected_genes_biotype_m %>%
  ggplot(aes(x = Group, y = n, fill = fct_reorder(biotype, n, .desc = TRUE))) +
  geom_bar(stat = "identity", position = "stack") +
  theme_bw() +
  theme(axis.text.x = element_text(angle = 60, hjust = 1)) +
  scale_fill_manual(values = palette_categorical,
                  name = "Type (ordered by decreasing proportion)" +
ylab("Number of genes") +
ggtitle("Mouse") +
theme(axis.title.x = element_blank()) +
scale_y_continuous(breaks = scales::breaks_extended(n = 6),
                  limits = c(0, 30000)) +
coord_cartesian(expand = FALSE)

p1 / p2

```

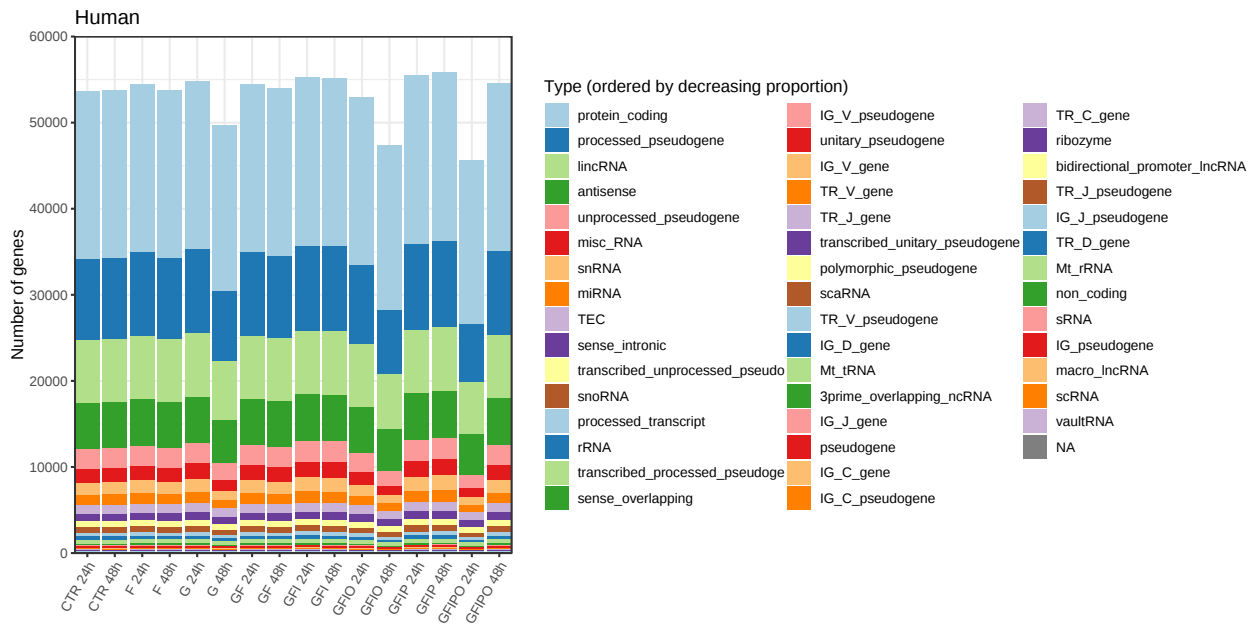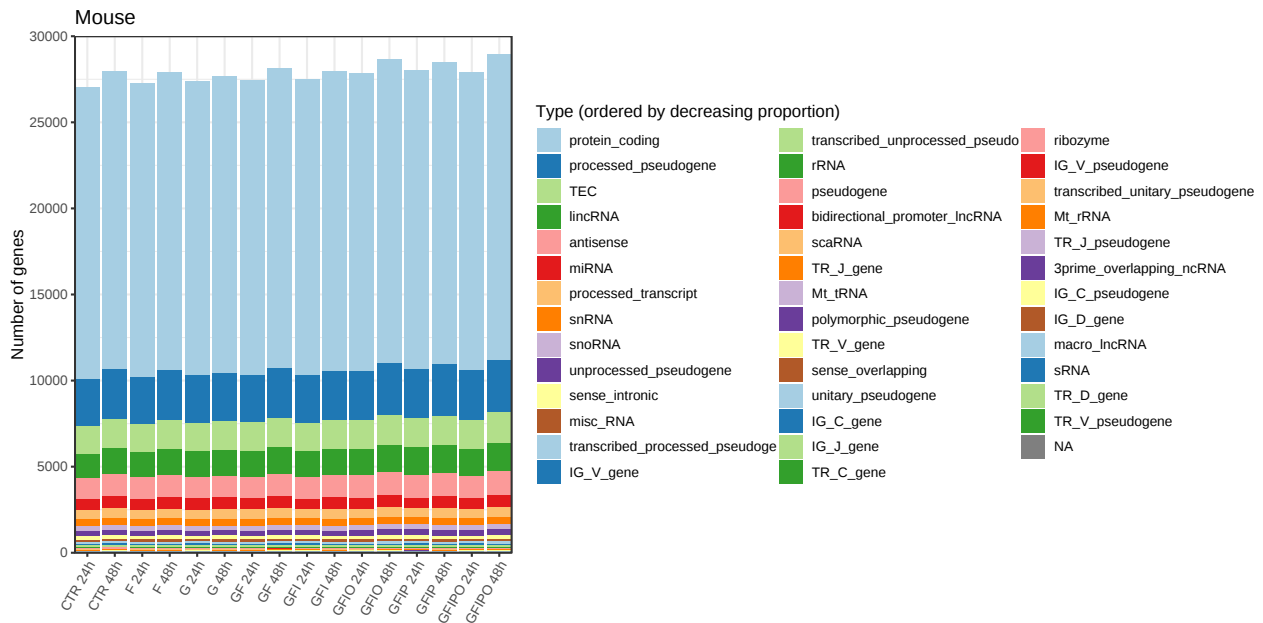

```
ggsave("plots/Supp_Fig_S2._Gene_Biotype.pdf",
       width = 12,
       height = 12)
```

```
ggsave("plots_png/Supp_Fig_S2._Gene_Biotype.png",
       width = 12,
       height = 12)
```

## Supplemental Figure S3. Principal Component Analysis

```
### PC1 vs PC2
hPc1.pc2 <- hPca.df %>%
  ggplot(aes(x = PC1, y = PC2, color = donor_id, shape = timepoint)) +
  geom_point(size = 2) +
  scale_shape_manual(values = 1:2) +
  ggrepel::geom_text_repel(aes(label = ifelse(PC1 > 200, sample_name, "")),
    size = 3) +
  xlab(paste0("PC1 (", round(hPcv["PC1"], digits = 2), " %)") +
  ylab(paste0("PC2 (", round(hPcv["PC2"], digits = 2), " %)") +
  theme_bw() +
  ggtitle("Human") +
  labs(color = "Human donor", shape = "Incubation time") +
  coord_fixed(ratio = 1)

mPc1.pc2 <- mPca.df %>%
  ggplot(aes(x = PC1, y = PC2, color = animal_id, shape = timepoint)) +
  geom_point(size = 2) +
  scale_shape_manual(values = 1:2) +
  xlab(paste0("PC1 (", round(mPcv["PC1"], digits = 2), " %)") +
  ylab(paste0("PC2 (", round(mPcv["PC2"], digits = 2), " %)") +
  theme_bw() +
  ggtitle("Mouse") +
  labs(color = "Mouse donor", shape = "Incubation time") +
  coord_fixed(ratio = 1)
```

```
### PC1 vs PC3
hPc1.pc3 <- hPca.df %>%
  ggplot(aes(x = PC1, y = PC3, color = donor_id, shape = timepoint)) +
  geom_point(size = 2) +
  scale_shape_manual(values = 1:2) +
  ggrepel::geom_text_repel(aes(label = ifelse(PC1 > 200, sample_name, "")),
    size = 3) +
  xlab(paste0("PC1 (", round(hPcv["PC1"], digits = 2), " %)") +
  ylab(paste0("PC3 (", round(hPcv["PC3"], digits = 2), " %)") +
  theme_bw() +
  ggtitle("Human") +
  labs(color = "Human donor", shape = "Incubation time") +
  coord_fixed(ratio = 1)

mPc1.pc3 <- mPca.df %>%
  ggplot(aes(x = PC1, y = PC3, color = animal_id, shape = timepoint)) +
  geom_point(size = 2) +
  scale_shape_manual(values = 1:2) +
  xlab(paste0("PC1 (", round(mPcv["PC1"], digits = 2), " %)") +
  ylab(paste0("PC3 (", round(mPcv["PC3"], digits = 2), " %)") +
  theme_bw() +
  ggtitle("Mouse") +
  labs(color = "Mouse donor", shape = "Incubation time") +
  coord_fixed(ratio = 1)
```

```
### PC2 vs PC3
hPc2.pc3 <- hPca.df %>%
  ggplot(aes(x = PC2, y = PC3, color = donor_id, shape = timepoint)) +
```

```

geom_point(size = 2) +
scale_shape_manual(values = 1:2) +
ggrepel::geom_text_repel(aes(label = ifelse(PC3 > 200, sample_name, "")),
                          size = 3) +
xlab(paste0("PC2 (", round(hPcv["PC2"], digits = 2), " %)") +
ylab(paste0("PC3 (", round(hPcv["PC3"], digits = 2), " %)") +
theme_bw() +
ggtitle("Human") +
labs(color = "Human donor", shape = "Incubation time") +
coord_fixed(ratio = 1)

mPc2.pc3 <- mPca.df %>%
ggplot(aes(x = PC2, y = PC3, color = animal_id, shape = timepoint)) +
geom_point(size = 2) +
scale_shape_manual(values = 1:2) +
xlab(paste0("PC2 (", round(mPcv["PC2"], digits = 2), " %)") +
ylab(paste0("PC3 (", round(mPcv["PC3"], digits = 2), " %)") +
theme_bw() +
ggtitle("Mouse") +
labs(color = "Mouse donor", shape = "Incubation time") +
coord_fixed(ratio = 1)

p12 <- hPc1.pc2 + mPc1.pc2
p13 <- hPc1.pc3 + mPc1.pc3
p23 <- hPc2.pc3 + mPc2.pc3

(p12 / p13 / p23) + plot_layout(guides = "collect")

```

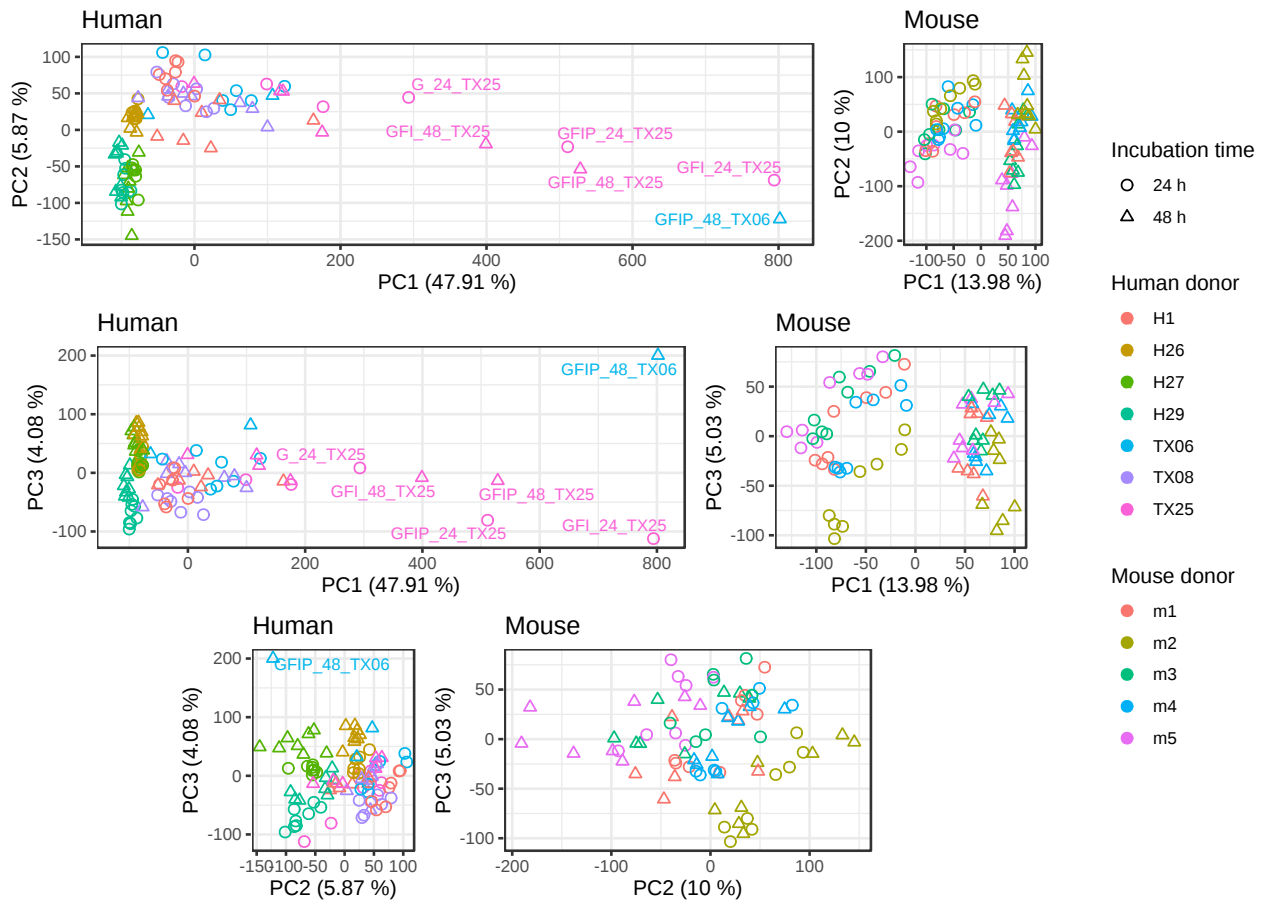

```

ggsave("plots/Supp_Fig_S3._Principal_Component_Analysis.pdf",
        width = 10,
        height = 7)

ggsave("plots_png/Supp_Fig_S3._Principal_Component_Analysis.png",
        width = 10,
        height = 7)

```

## Supplemental Figure S4. Expression variability across conditions

```
## human - compute squared coefficient of variation for each gene per group
### Initiate empty dataframe
hDf <-
  data.frame(
    ensgid = NA_character_,
    sCV = NA_integer_,
    log10mean_normCounts = NA_integer_,
    group = NA_character_
  )

### Iterate over groups
for (group in unique(sample_sheet_human$Group)) {
  ## Subset expr matrix to samples from current group and genes that have
  ## non-zero expression
  currD <-
    norm_counts_human[
      which(apply(norm_counts_human, 1, function(x) !any(x == 0))),
      sample_sheet_human %>% filter(Group == group) %>% pull(sampleId)
    ]

  ## Calculate per gene statistics within group
  currStd <- apply(currD, 1, sd)
  currMean <- apply(currD, 1, mean)
  currCV <- (currStd / currMean) ^ 2

  # sort by mean normCounts
  idx <- sort(currMean, index.return = T)$ix
  currMean <- log10(currMean[idx])
  currCV <- currCV[idx]

  currDf <-
    data.frame(
      ensgid = names(currMean),
      sCV = currCV,
      log10mean_normCounts = currMean,
      group = rep(group, length(currMean))
    )
  hDf <- rbind(hDf, currDf)
}

## remove the NA line of initialization
hDf <- hDf[-1, ]

## mouse - compute squared coefficient of variation for each gene per group
mDf <-
  data.frame(
    ensgid = NA_character_,
    sCV = NA_integer_,
    log10mean_normCounts = NA_integer_,
    group = NA_character_
  )
```



```

for (group in unique(sample_sheet_mouse$Group)) {
  currD <-
  norm_counts_mouse[
    which(apply(norm_counts_mouse, 1, function(x) !any(x == 0))),
    sample_sheet_mouse %>% filter(Group == group) %>% pull(sampleId)
  ]

  currStd <- apply(currD, 1, sd)
  currMean <- apply(currD, 1, mean)
  currCV <- (currStd / currMean) ^ 2

  # sort by mean normCounts
  idx <- sort(currMean, index.return = T)$ix
  currMean <- log10(currMean[idx])
  currCV <- currCV[idx]

  currDf <-
  data.frame(
    ensgid = names(currMean),
    sCV = currCV,
    log10mean_normCounts = currMean,
    group = rep(group, length(currMean))
  )
  mDf <- rbind(mDf, currDf)
}
## remove the NA line of initialization
mDf <- mDf[-1, ]

```

```

hCVplot <- ggplot(hDf,
  aes(
    x = log10mean_normCounts,
    y = sCV,
    fill = as.factor(group),
    color = as.factor(group)
  )) +
  geom_smooth(alpha = 0.1, linetype = 0) +
  geom_line(stat = "smooth", alpha = 0.6) +
  scale_fill_manual(values = palette_cat_16) +
  scale_color_manual(values = palette_cat_16) +
  theme_bw() +
  coord_cartesian(ylim = c(0,1)) +
  labs(fill = "Group", color = "Group") +
  xlab("log10(mean(normCounts))") +
  ylab(bquote(CV ^ {2})) +
  ggtitle("Human") +
  theme(legend.position = "none")

mCVplot <- ggplot(mDf,
  aes(
    x = log10mean_normCounts,
    y = sCV,
    fill = as.factor(group),
    color = as.factor(group)
  )) +

```

```

geom_smooth(alpha = 0.1, linetype = 0) +
geom_line(stat = "smooth", alpha = 0.6) +
scale_fill_manual(values = palette_cat_16) +
scale_color_manual(values = palette_cat_16) +
theme_bw() +
coord_cartesian(ylim = c(0,1)) +
labs(fill = "Group", color = "Group") +
xlab("log10(mean(normCounts))") +
ylab(bquote(CV ^ {
  2
})) +
ggtitle("Mouse")

```

```
hCVplot + mCVplot + plot_layout(guides = "collect")
```

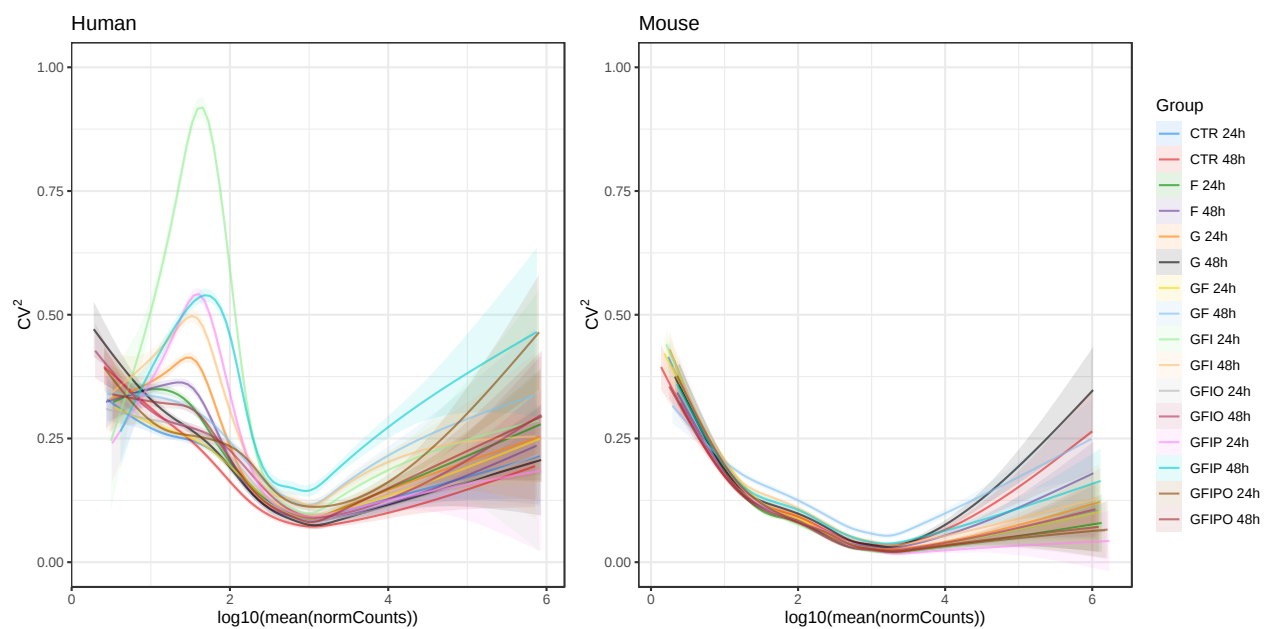

```

ggsave("plots/Supp_Fig_S4._Expression_variability_across_conditions.pdf",
width = 7,
height = 5)

```

```

ggsave("plots_png/Supp_Fig_S4._Expression_variability_across_conditions.png",
width = 7,
height = 5)

```

## Supplemental Figure S5. Explained variance by Principal Component

```
## create screeplot (variance per PC)
hDf <- data.frame(PC = 1:10, var = hPcv[1:10])
p1 <- ggplot(data = hDf, aes(x = PC, y = var)) +
  geom_line(color = "grey") +
  geom_point() +
  theme_bw() +
  scale_x_continuous(limits = c(1, 10), breaks = 1:10) +
  scale_y_continuous(limits = c(0, 50), breaks = seq(0, 50, 10)) +
  ggtitle("Human") +
  ylab("% explained variance")

## create screeplot (variance per PC)
mDf <- data.frame(PC = 1:10, var = mPcv[1:10])
p2 <- ggplot(data = mDf, aes(x = PC, y = var)) +
  geom_line(color = "grey") +
  geom_point() +
  theme_bw() +
  scale_x_continuous(limits = c(1, 10), breaks = 1:10) +
  scale_y_continuous(limits = c(0, 50), breaks = seq(0, 50, 10)) +
  ggtitle("Mouse") +
  theme(axis.title.y = element_blank())

p1 + p2
```

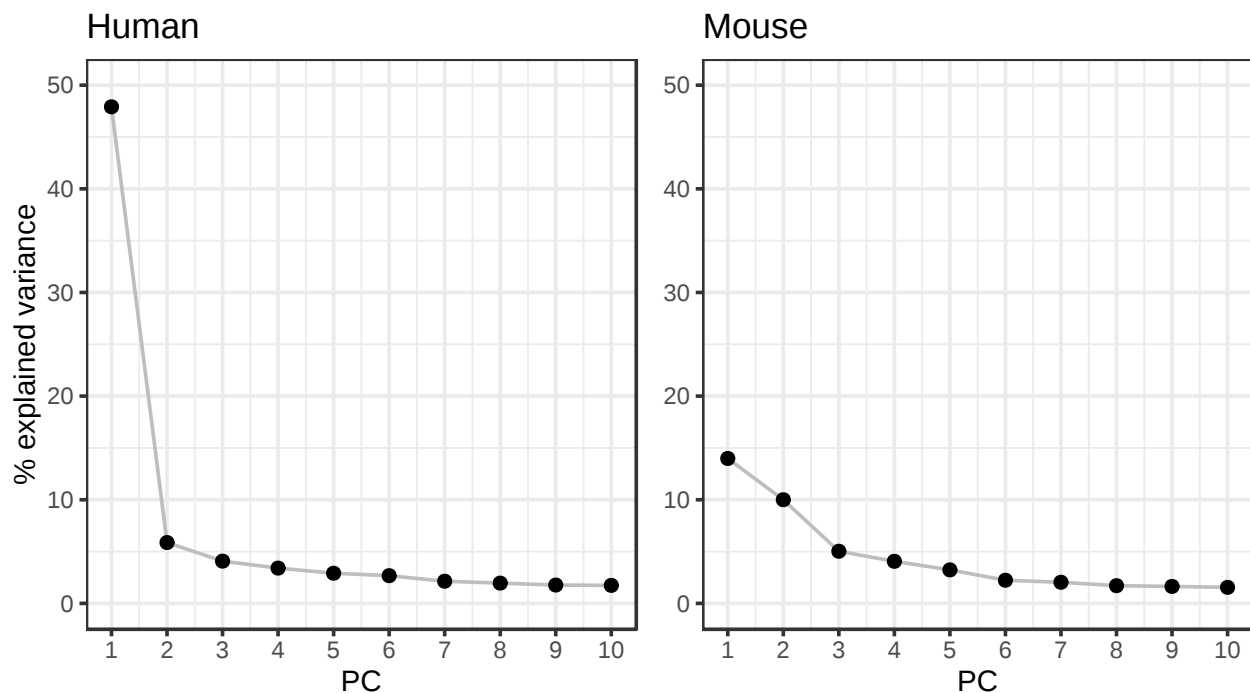

```
ggsave("plots/Supp_Fig_S5._Explained_variance_by_Principal_Component.pdf",
  width = 7,
  height = 4)
```

```
ggsave("plots_png/Supp_Fig_S5._Explained_variance_by_Principal_Component.png",  
        width = 7,  
        height = 4)
```

## Supplemental Figure S6. Top Genes from PCA loadings

```
pc_loadings_h <- pca_human$rotation %>%
  as_tibble(rownames = "gene")

pc_loadings_m <- pca_mouse$rotation %>%
  as_tibble(rownames = "gene")

top_genes_h <- pc_loadings_h %>%
  select(ensgid = gene, PC1, PC2, PC3) %>%
  pivot_longer(starts_with("PC"), names_to = "PC", values_to = "loading") %>%
  group_by(PC) %>%
  arrange(desc(abs(loading))) %>%
  dplyr::slice(1:10) %>%
  left_join(gene_info_h %>% select(ensgid, gene_symbol), by = "ensgid")

top_loadings_h <- pc_loadings_h %>%
  inner_join(top_genes_h, by = c(gene = "ensgid"))

top_genes_m <- pc_loadings_m %>%
  select(ensgid = gene, PC1, PC2, PC3) %>%
  pivot_longer(starts_with("PC"), names_to = "PC", values_to = "loading") %>%
  group_by(PC) %>%
  arrange(desc(abs(loading))) %>%
  dplyr::slice(1:10) %>%
  left_join(gene_info_m %>% select(ensgid, gene_symbol), by = "ensgid")

top_loadings_m <- pc_loadings_m %>%
  inner_join(top_genes_m, by = c(gene = "ensgid"))

plot_pca_loadings <- function(df, x, y) {
  df %>%
    filter(PC %in% c(x, y)) %>%
    ggplot() +
    geom_hline(yintercept = 0, color = "darkblue", alpha = 0.3) +
    geom_vline(xintercept = 0, color = "darkblue", alpha = 0.3) +
    geom_segment(aes_(
      x = 0,
      y = 0,
      xend = as.name(x),
      yend = as.name(y)),
      arrow = arrow(length = unit(0.1, "in")),
      color = "brown") +
    ggrepel::geom_label_repel(
      aes_(x = as.name(x), y = as.name(y), label = ~gene_symbol),
      force = 3,
      max.time = 2,
      max.iter = 20000,
      seed = 1,
      max.overlaps = 20
    ) +
    theme_bw() +
```

```

    ylab(paste(y, "loading")) +
    xlab(paste(x, "loading"))
}

p1 <- plot_pca_loadings(top_loadings_h, x = "PC1", y = "PC2") +
  ylim(-0.004, 0.02) +
  xlim(-0.0015, 0.008) +
  ggtitle("Human")

p2 <- plot_pca_loadings(top_loadings_m, x = "PC1", y = "PC2") +
  ylim(-0.017, 0.005) +
  xlim(-0.02, 0.015) +
  ggtitle("Mouse")

p3 <- plot_pca_loadings(top_loadings_h, x = "PC1", y = "PC3") +
  ylim(-0.02, 0.01) +
  xlim(-0.02, 0.015)

p4 <- plot_pca_loadings(top_loadings_m, x = "PC1", y = "PC3") +
  ylim(-0.03, 0.022) +
  xlim(-0.015, 0.015)

p1 + p2 + p3 + p4 + plot_layout(ncol = 2)

```

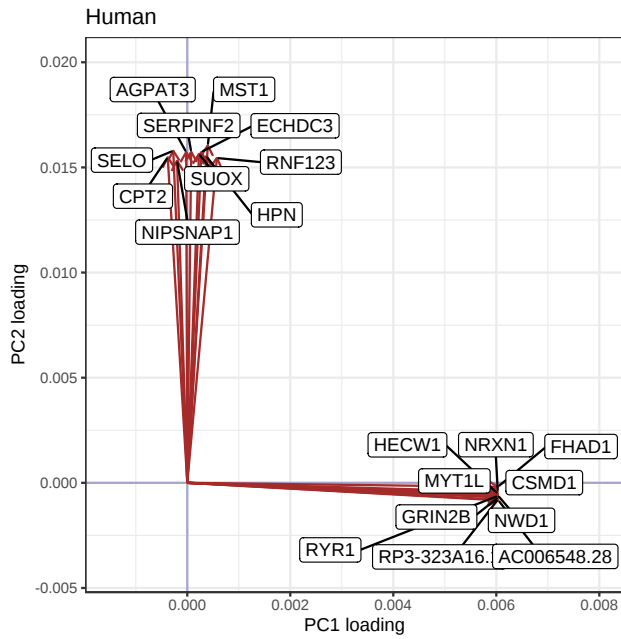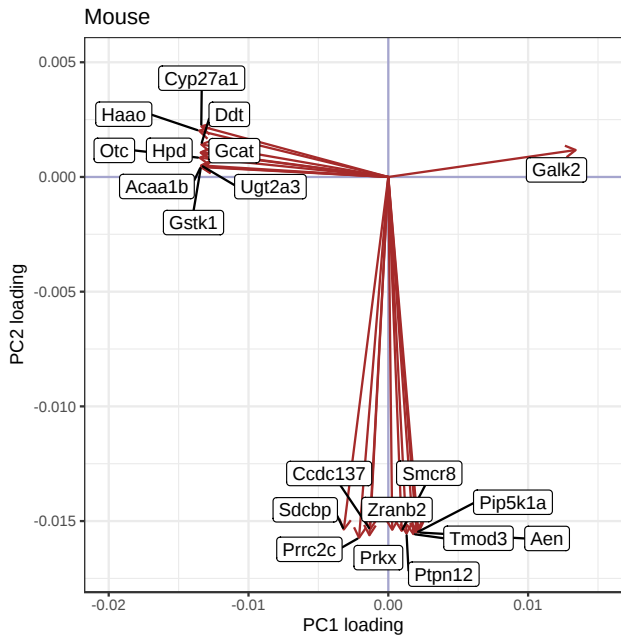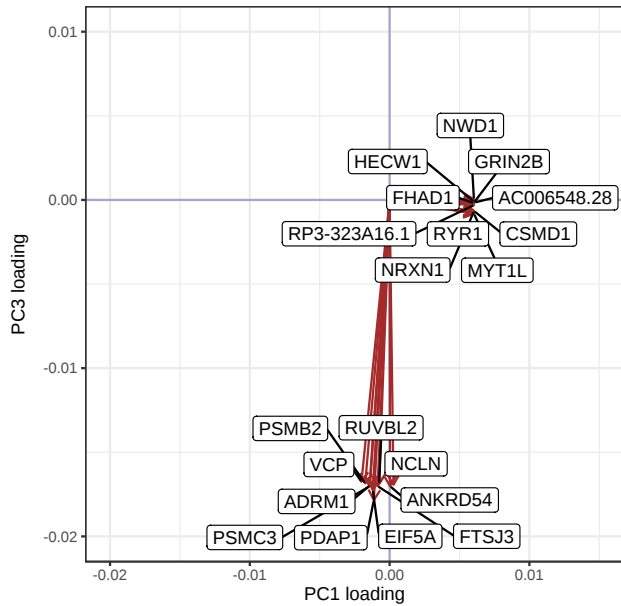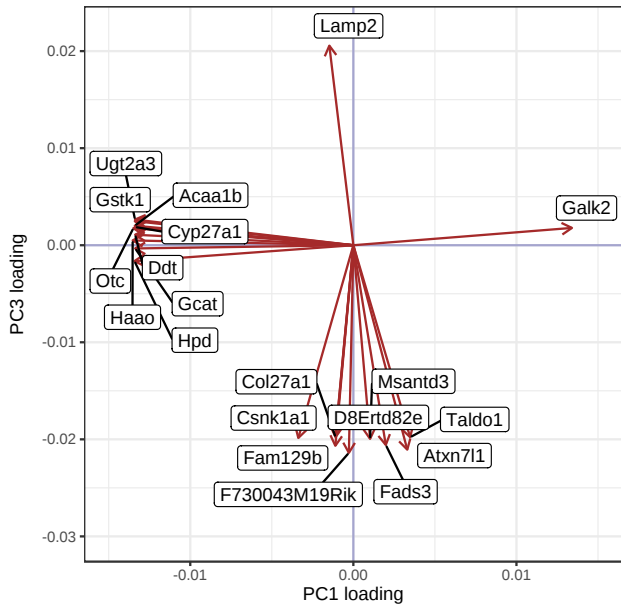

```
ggsave("plots/Supp_Fig_S6._Top_Genes_from_PCA_loadings.pdf",
       width = 11,
       height = 11)
```

```
ggsave("plots_png/Supp_Fig_S6._Top_Genes_from_PCA_loadings.png",
       width = 11,
       height = 11)
```

**Table 3. Top15 genes based on expression correlation.**

```
orthologs_expressed_info <- orthologs_expressed %>%
  left_join(gene_info_h %>% select(-biotype2),
            by = c(human_ensgid = "ensgid"))
```

```
most_correlated <- orthologs_expressed_info %>%
  dplyr::slice_max(cor_pearson, n = 15)
```

```
most_correlated %>%
  mutate(cor_pearson = round(cor_pearson, 2)) %>%
  select("Gene symbol" = gene_symbol,
         "Pearson R" = cor_pearson,
         "% global identity" = global_identity_perc,
         "Type" = biotype,
         "Human ensgid" = human_ensgid,
         "Mouse ensgid" = mouse_ensgid) %>%
  gt::gt()
```

| Gene symbol | Pearson R | % global identity | Type           | Human ensgid    | Mouse ensgid       |
|-------------|-----------|-------------------|----------------|-----------------|--------------------|
| FBN1        | 0.97      | 96                | protein_coding | ENSG00000166147 | ENSMUSG00000027204 |
| MT1A        | 0.96      | 82                | protein_coding | ENSG00000205362 | ENSMUSG00000031765 |
| CNNM3       | 0.96      | 86                | protein_coding | ENSG00000168763 | ENSMUSG00000001138 |
| MAGED2      | 0.96      | 87                | protein_coding | ENSG00000102316 | ENSMUSG00000025268 |
| STMN1       | 0.96      | 78                | protein_coding | ENSG00000117632 | ENSMUSG00000028832 |
| COL6A3      | 0.95      | 74                | protein_coding | ENSG00000163359 | ENSMUSG00000048126 |
| DDX56       | 0.95      | 91                | protein_coding | ENSG00000136271 | ENSMUSG00000004393 |
| BICC1       | 0.95      | 92                | protein_coding | ENSG00000122870 | ENSMUSG00000014329 |
| COL1A2      | 0.95      | 90                | protein_coding | ENSG00000164692 | ENSMUSG00000029661 |
| MMP2        | 0.95      | 96                | protein_coding | ENSG00000087245 | ENSMUSG00000031740 |
| ACKR2       | 0.95      | 72                | protein_coding | ENSG00000144648 | ENSMUSG00000044534 |
| PTRF        | 0.94      | 83                | protein_coding | ENSG00000177469 | ENSMUSG00000004044 |
| SMPDL3A     | 0.94      | 80                | protein_coding | ENSG00000172594 | ENSMUSG00000019872 |
| COL3A1      | 0.94      | 91                | protein_coding | ENSG00000168542 | ENSMUSG00000026043 |
| ERBB3       | 0.93      | 91                | protein_coding | ENSG00000065361 | ENSMUSG00000018166 |



**Table 4. Top18 genes based on experimental design.**

```
d0 %>%
  filter(flag_one2one == 1) %>%
  filter(abs(sum_sign) > 8) %>%
  slice_max(sum_score_h, n = 18) %>%
  select(gene_symbol, sum_score_h, ensgid, mouse_ensgid) %>%
  gt::gt()
```

| gene_symbol | sum_score_h | ensgid          | mouse_ensgid       |
|-------------|-------------|-----------------|--------------------|
| FST         | 94.75382    | ENSG00000134363 | ENSMUSG00000021765 |
| ARRDC4      | 67.89108    | ENSG00000140450 | ENSMUSG00000042659 |
| DEPP1       | 63.33067    | ENSG00000165507 | ENSMUSG00000048489 |
| PNPLA5      | 55.19282    | ENSG00000100341 | ENSMUSG00000018868 |
| FADS2       | 39.30799    | ENSG00000134824 | ENSMUSG00000024665 |
| FASN        | 34.90934    | ENSG00000169710 | ENSMUSG00000025153 |
| ERBB3       | 32.17391    | ENSG00000065361 | ENSMUSG00000018166 |
| YPEL3       | 30.92697    | ENSG00000090238 | ENSMUSG00000042675 |
| PCK1        | 29.46294    | ENSG00000124253 | ENSMUSG00000027513 |
| MID1IP1     | 27.98179    | ENSG00000165175 | ENSMUSG00000008035 |
| LPIN2       | 27.15697    | ENSG00000101577 | ENSMUSG00000024052 |
| ATG2A       | 24.60637    | ENSG00000110046 | ENSMUSG00000024773 |
| ABCA9       | 24.30305    | ENSG00000154258 | ENSMUSG00000041797 |
| OCLN        | 23.78411    | ENSG00000197822 | ENSMUSG00000021638 |
| GRB7        | 23.46960    | ENSG00000141738 | ENSMUSG00000019312 |
| ANGPTL8     | 23.43666    | ENSG00000130173 | ENSMUSG00000047822 |
| HSD17B11    | 22.31949    | ENSG00000198189 | ENSMUSG00000029311 |
| NR1I3       | 20.25732    | ENSG00000143257 | ENSMUSG00000005677 |

## Session info

```
pander::pander(sessionInfo())
```

**R version 4.1.2 (2021-11-01)**

**Platform:** x86\_64-pc-linux-gnu (64-bit)

**locale:** LC\_CTYPE=en\_US.UTF-8, LC\_NUMERIC=C, LC\_TIME=en\_US.UTF-8, LC\_COLLATE=en\_US.UTF-8, LC\_MONETARY=en\_US.UTF-8, LC\_MESSAGES=en\_US.UTF-8, LC\_PAPER=en\_US.UTF-8, LC\_NAME=C, LC\_ADDRESS=C, LC\_TELEPHONE=C, LC\_MEASUREMENT=en\_US.UTF-8 and LC\_IDENTIFICATION=C

**attached base packages:** *grid*, *stats4*, *stats*, *graphics*, *grDevices*, *utils*, *datasets*, *methods* and *base*

**other attached packages:** *patchwork*(v.1.1.1), *gridExtra*(v.2.3), *SummarizedExperiment*(v.1.24.0), *Biobase*(v.2.54.0), *GenomicRanges*(v.1.46.1), *GenomeInfoDb*(v.1.30.1), *IRanges*(v.2.28.0), *S4Vectors*(v.0.32.3), *BiocGenerics*(v.0.40.0), *MatrixGenerics*(v.1.6.0), *matrixStats*(v.0.61.0), *ggbeeswarm*(v.0.6.0), *forcats*(v.0.5.1), *stringr*(v.1.4.0), *dplyr*(v.1.0.8), *purrr*(v.0.3.4), *readr*(v.2.1.2), *tidyr*(v.1.2.0), *tibble*(v.3.1.6), *ggplot2*(v.3.3.5) and *tidyverse*(v.1.3.1)

**loaded via a namespace (and not attached):** *colorspace*(v.2.0-3), *ggsignif*(v.0.6.3), *ellipsis*(v.0.3.2), *XVector*(v.0.34.0), *fs*(v.1.5.2), *rstudioapi*(v.0.13), *ggpubr*(v.0.4.0), *farver*(v.2.1.0), *ggrepel*(v.0.9.1), *bit64*(v.4.0.5), *fansi*(v.1.0.2), *lubridate*(v.1.8.0), *xml2*(v.1.3.3), *splines*(v.4.1.2), *ggh4x*(v.0.2.1), *knitr*(v.1.37), *jsonlite*(v.1.8.0), *Cairo*(v.1.5-14), *gt*(v.0.3.1), *broom*(v.0.7.12), *dbplyr*(v.2.1.1), *compiler*(v.4.1.2), *httr*(v.1.4.2), *backports*(v.1.4.1), *assertthat*(v.0.2.1), *Matrix*(v.1.4-0), *fastmap*(v.1.1.0), *cli*(v.3.2.0), *htmltools*(v.0.5.2), *tools*(v.4.1.2), *coda*(v.0.19-4), *gtable*(v.0.3.0), *glue*(v.1.6.2), *GenomeInfoDbData*(v.1.2.7), *tinytex*(v.0.36), *Rcpp*(v.1.0.8), *carData*(v.3.0-5), *cellranger*(v.1.1.0), *statnet.common*(v.4.5.0), *vctrs*(v.0.3.8), *nlme*(v.3.1-155), *ggthemes*(v.0.1.1), *xfun*(v.0.29), *network*(v.1.17.1), *rvest*(v.1.0.2), *lifecycle*(v.1.0.1), *rstatix*(v.0.7.0), *dendextend*(v.1.15.2), *zlibbioc*(v.1.40.0), *scales*(v.1.2.0), *vroom*(v.1.5.7), *ragg*(v.1.2.1), *hms*(v.1.1.1), *parallel*(v.4.1.2), *RColorBrewer*(v.1.1-2), *yaml*(v.2.2.2), *pander*(v.0.6.4), *sass*(v.0.4.0), *yulab.utils*(v.0.0.4), *stringi*(v.1.7.6), *checkmate*(v.2.0.0), *rlang*(v.1.0.2), *pkgconfig*(v.2.0.3), *systemfonts*(v.1.0.4), *bitops*(v.1.0-7), *evaluate*(v.0.14), *lattice*(v.0.20-45), *labeling*(v.0.4.2), *bit*(v.4.0.4), *tidyselect*(v.1.1.1), *magrittr*(v.2.0.2), *R6*(v.2.5.1), *generics*(v.0.1.2), *DelayedArray*(v.0.20.0), *DBI*(v.1.1.2), *mgcv*(v.1.8-38), *pillar*(v.1.7.0), *haven*(v.2.4.3), *withr*(v.2.5.0), *abind*(v.1.4-5), *RCurl*(v.1.98-1.6), *modelr*(v.0.1.8), *crayon*(v.1.5.0), *car*(v.3.0-12), *utf8*(v.1.2.2), *tzdb*(v.0.2.0), *rmarkdown*(v.2.11), *viridis*(v.0.6.2), *readxl*(v.1.3.1), *reprex*(v.2.0.1), *digest*(v.0.6.29), *gridGraphics*(v.0.5-1), *textshaping*(v.0.3.6), *munsell*(v.0.5.0), *viridisLite*(v.0.4.0), *beeswarm*(v.0.4.0), *ggplotify*(v.0.1.0) and *vipor*(v.0.4.5)
